# Supplementary material
Source: publisher figshare collection journal article supplement (https://acs.figshare.com/ndownloader/files/5173648)

## Supporting Information

# Synthesis of D- and L-2,3-*trans*-3,4-*cis*-4,5-*trans*-3,4-Dihydroxy-5-hydroxymethylproline and of Tripeptides Containing Them

*Antonio J. Moreno-Vargas,<sup>a,b\*</sup> Inmaculada Robina,<sup>b</sup> Elena Petricci<sup>a</sup> and Pierre Vogel<sup>a</sup>*

<sup>a</sup>Laboratoire de Glycochimie et de Synthèse Asymétrique, Swiss Federal Institute of Technology (EPFL), BCH, CH-1015 Lausanne-Dorigny, Switzerland

<sup>b</sup>Departamento de Química Orgánica de la Facultad de Química, Universidad de Sevilla, Apartado 553, E-41071 Sevilla, Spain

## Table of contents

1. General Experimental Part.
2. Experimental data for preparation of compounds 15, 16, 17 and 20-22, and complete spectral characterization data for all the new compounds.
3. <sup>1</sup>H- and <sup>13</sup>C- NMR spectra for all the new compounds

## 1. General Experimental Part.

The procedures described for racemic products were applied to the preparation of enantiomerically pure products. Apart from the  $[\alpha]$  values and m.p., all other data were identical for enantiomerically pure products and the corresponding racemates.  $^1\text{H}$  NMR and  $^{13}\text{C}$  NMR signals assignments were confirmed by 2D COSY and HMQC. Optical rotations were measured at 25 °C. TLC was performed on silica gel HF<sub>254</sub>, with detection by UV light and charring with Pancaldi, ninhydrin or  $\text{KMnO}_4$ . Silica gel (240-400 mesh) was used for preparative chromatography. Anhyd. solvents and reagents were freshly distilled under  $\text{N}_2$  prior to use: THF from sodium and benzophenone,  $\text{CH}_2\text{Cl}_2$  and *i*-Pr<sub>2</sub>NEt from  $\text{CaH}_2$ .

## 2. Complete Spectral Characterization Data.

**(±)-7-*tert*-Butoxycarbonyl-5,6-*exo*-isopropylidenedioxy-7-azabicyclo[2.2.1]heptane-2-*endo*-ol ((-)-9) and 7-*tert*-butoxycarbonyl-5,6-*exo*-isopropylidenedioxy-7-azabicyclo[2.2.1]-hept-2-ene (10).**

*Data for (-)-9*:  $[\alpha]_{\text{D}} -8$  (c 1.0,  $\text{CH}_2\text{Cl}_2$ ),  $[\alpha]_{577} -10.3$ ,  $[\alpha]_{546} -11.7$ ,  $[\alpha]_{435} -12.5$ ,  $[\alpha]_{405} -15.9$ . IR  $\nu_{\text{max}}$  3443, 2978, 1681, 1416, 1173, 1058  $\text{cm}^{-1}$ ;  $^1\text{H}$  NMR (400 MHz,  $\text{DMSO}-d_6$ , 363 K,  $\delta$  ppm, *J* Hz)  $\delta$  4.90 (bs, 1 H, OH), 4.71 (d, 1 H,  $J_{5,6} = 5.6$ , H-5), \* 4.24 (d, 1 H, H-6), \* 4.07 (dt, 1 H, H-2), 3.99 (d,  $J_{3a,4} = 5.9$ , H-4), 3.97 (d,  $J_{1,2} = 4.8$ , H-1), 2.02 (ddd, 1 H,  $J_{2,3a} = 9.8$ ,  $J_{3a,3b} = 13.0$ , H-3a), 0.86 (dd, 1 H, H-3b);  $^{13}\text{C}$  NMR (100.5 MHz,  $\text{DMSO}-d_6$ , 363 K,  $\delta$  ppm)  $\delta$  152.5 (CO), 108.3 ( $\text{C}(\text{CH}_3)_2$ ), 80.1 (C-5), \* 77.3 ( $\text{C}(\text{CH}_3)_3$ ), 75.9 (C-6), \* 66.2 (C-2), 61.0, 58.4 (C-1, C-4), 32.4 (C-3), 27.2 ( $\text{C}(\text{CH}_3)_3$ ), 24.6, 23.4 ( $\text{C}(\text{CH}_3)_2$ ); CIMS *m/z* 286 [4%, (M+H)<sup>+</sup>], *m/z* 270 [8%, (M-Me)<sup>+</sup>], *m/z* 230 [100%, (M-Bu<sup>t</sup>+2H)<sup>+</sup>], *m/z* 186 [25%, (M-Boc+2H)<sup>+</sup>]; HRCIMS *m/z* found 286.1650, calcd for  $\text{C}_{14}\text{H}_{23}\text{NO}_5 + \text{H}$  286.1654; Analysis, calcd for  $\text{C}_{14}\text{H}_{23}\text{NO}_5$ : C, 58.95; H, 8.07; N, 4.91; Found: C, 58.76; H, 8.30; N, 4.70. *Data for 10*: m. p. 77-79 °C; IR  $\nu_{\text{max}}$  2978, 2936, 1698, 1468, 1368, 1207, 1158, 1057, 882, 857  $\text{cm}^{-1}$ ;  $^1\text{H}$  NMR (400 MHz,  $\text{DMSO}-d_6$ , 343 K,  $\delta$  ppm, *J* Hz)  $\delta$  6.37 (t, 2 H,  $J_{1,2} = J_{3,4} = J_{2,4} = J_{1,3} = 1.3$ , H-2 and H-3), 4.50 (t, 2 H, H-1 and H-4), 4.24 (s, 2 H, H-5 and H-6), 1.40 (s, 9H,  $\text{C}(\text{CH}_3)_3$ ), 1.36, 1.25 (2 s, 3 H each,  $\text{C}(\text{CH}_3)_2$ );  $^{13}\text{C}$  NMR (100.5 MHz,  $\text{DMSO}-d_6$ , 343 K,  $\delta$  ppm)  $\delta$  152.6 (CO), 135.2 (C-2 and C-3), 113.9 ( $\text{C}(\text{CH}_3)_2$ ), 78.5 (C-5

and C-6), 77.8 ( $C(CH_3)_3$ ), 61.5 (C-1 and C-4), 27.2 ( $C(CH_3)_3$ ), 25.3, 24.3 ( $C(CH_3)_2$ ); CIMS  $m/z$  252 [5%, (M-Me)<sup>+</sup>],  $m/z$  168 [10%, (M-Boc+2H)<sup>+</sup>]; Analysis, calcd for  $C_{14}H_{21}NO_4$ : C, 62.90; H, 7.92; N, 5.24; Found: C, 62.60; H, 7.96; N, 5.16.

**(+)-7-*tert*-Butoxycarbonyl-5,6-*exo*-isopropylidenedioxy-7-azabicyclo[2.2.1]heptane-2-*endo*-ol**

**((+)-9).** This compound was prepared in the manner described for (-)-9 except that pure (+)-8 was used. Pure (+)-9 was obtained in 73% yield.  $[\alpha]_D +7.3$  ( $c$  1.0,  $CH_2Cl_2$ ),  $[\alpha]_{577} +9.2$ ,  $[\alpha]_{546} +10$ ,  $[\alpha]_{435} +12.1$ ,  $[\alpha]_{405} +14.5$ .

**(1*R*,2*R*,3*S*,4*S*,4'*R*,5'*R*)- and (1*S*,2*S*,3*R*,4*R*,4'*R*,5'*R*)-4',5'-Diphenylspiro[2,3-*exo*-isopropylidenedioxy-7-*tert*-butoxycarbonyl-7-azabicyclo[2.2.1]hept-2,2'-imidazoline] (+)-12 and (-)-13.** Data for (+)-12:  $[\alpha]_D +73$  ( $c$  1.65,  $CHCl_3$ );  $^{13}C$  NMR (75.4 MHz,  $CDCl_3$ - $Et_3N$ , 298 K,  $\delta$  ppm, mixture of rotamers 1.2:1) *Major rotamer*:  $\delta$  155.0 (CO), 141.3, 139.6 (2 C-1 of Ph), 128.1-126.9 (10 C-aromat.), 111.0 ( $C(CH_3)_2$ ), 81.7 (C-6), 80.8, 78.6 (C-2, C-3), 79.6 ( $C(CH_3)_3$ ), 70.2, 69.2 (C-4', C-5'), 66.3 (C-4), 59.2 (C-1), 43.0 (C-5), 28.3 ( $C(CH_3)_3$ ), 25.5, 24.1 ( $(CH_3)_2C$ ). *Minor rotamer*:  $\delta$  154.9 (CO), 141.3, 139.4 (2 C-1 of Ph), 128.1-126.9 (10 C-aromat.), 111.0 ( $C(CH_3)_3$ ), 81.5 (C-6), 81.4, 78.7 (C-2, C-3), 79.7 ( $C(CH_3)_3$ ), 70.2, 69.3 (C-4', C-5'), 67.5 (C-4), 58.3 (C-1), 42.7 (C-5), 28.3 ( $C(CH_3)_3$ ), 25.5, 24.1 ( $(CH_3)_2C$ ); CIMS  $m/z$  478 [70%, (M+H)<sup>+</sup>]; HRCIMS  $m/z$  found 477.2626, calcd for  $C_{28}H_{35}N_3O_4$  477.2628. Data for (-)-13:  $[\alpha]_D -38$  ( $c$  1.65,  $CHCl_3$ );  $^{13}C$  NMR (75.4 MHz,  $CDCl_3$ - $Et_3N$ , 298 K,  $\delta$  ppm, mixture of rotamers 3.5:1) *Major rotamer*:  $\delta$  154.7 (CO), 141.8, 138.8 (2 C-1 of Ph), 128.7-126.1 (10 C-aromat.), 110.8 ( $C(CH_3)_2$ ), 83.4 (C-6), 81.3, 78.6 (C-2, C-3), 79.6 ( $C(CH_3)_3$ ), 71.8, 69.2 (C-4', C-5'), 67.8 (C-4), 58.4 (C-1), 41.1 (C-5), 28.4 ( $C(CH_3)_3$ ), 25.6, 24.3 ( $(CH_3)_2C$ ). *Minor rotamer*:  $\delta$  154.7 (CO), 141.0, 140.9 (2 C-1 of Ph), 128.7-126.1 (10 C-aromat.), 110.8 ( $C(CH_3)_3$ ), 82.9 (C-6), 81.6, 78.5 (C-2, C-3), 79.5 ( $C(CH_3)_2$ ), 71.3, 69.3 (C-4', C-5'), 67.1 (C-4), 59.7 (C-1), 42.6 (C-5), 28.3 ( $C(CH_3)_3$ ), 25.6, 24.3 ( $(CH_3)_2C$ ); CIMS  $m/z$  478 [100%, (M+H)<sup>+</sup>]; HRCIMS  $m/z$  found 477.2620, calcd for  $C_{28}H_{35}N_3O_4$  477.2628.

**(-)-7-*tert*-Butoxycarbonyl-5,6-*exo*-isopropylidenedioxy-7-azabicyclo[2.2.1]hept-2-one ((-)-3).**

Method a). To a stirred solution of oxalyl chloride (68  $\mu$ l, 0.78 mmol) in anhydrous  $\text{CH}_2\text{Cl}_2$  (2 ml) at  $-70^\circ\text{C}$ , was added a solution of DMSO (106  $\mu$ l, 1.56 mmol) in anhydrous  $\text{CH}_2\text{Cl}_2$  (0.5 ml) dropwise. After addition, the mixture was stirred at  $-70^\circ\text{C}$  for 10 min and then a solution of alcohol (-)-**9** (184 mg, 0.65 mmol) in anhydrous  $\text{CH}_2\text{Cl}_2$  (2 ml) was added dropwise. The mixture was stirred for a further 20 min and then  $\text{Et}_3\text{N}$  (0.5 ml, 3.25 mmol) was added dropwise. The mixture was allowed to reach  $20^\circ\text{C}$  and then washed with  $\text{H}_2\text{O}$ . The organic layer was separated and the aqueous phase reextracted with  $\text{CH}_2\text{Cl}_2$ . The combined organic layers were dried ( $\text{MgSO}_4$ ) and evaporated. The residue was chromatographed on silica gel (ether:petroleum ether, 3:1) to give (-)-**3** (162 mg, 91%) as a white solid. M.p.  $85-87^\circ\text{C}$ ;  $[\alpha]_D -51.9$  ( $c$  1.11,  $\text{CH}_2\text{Cl}_2$ ),  $[\alpha]_{577} -54.7$ ,  $[\alpha]_{546} -65.5$ ,  $[\alpha]_{435} -181$ ,  $[\alpha]_{405} -282$ ; IR  $\nu_{\text{max}}$  2978, 2936, 1771, 1704, 1403, 1368, 1210, 1171, 1104, 1058  $\text{cm}^{-1}$ ;  $^1\text{H}$  NMR (400 MHz,  $\text{CDCl}_3$ , 313 K,  $\delta$  ppm,  $J$  Hz)  $\delta$  4.67 (d, 1H,  $J_{3a,4} = 5.4$ , H-4), 4.41 (d, 1 H,  $J_{5,6} = 5.4$ , H-5), \* 4.37 (d, 1 H, H-6), \* 4.34 (s, 1 H, H-1), 2.40 (dd, 1 H,  $J_{3a,3b} = 17.8$ , H-3a), 1.80 (d, 1 H, H-3b), 1.47 (s, 12 H,  $\text{C}(\text{CH}_3)_3$ ,  $\text{C}(\text{CH}_3)_2$ ), 1.2 (s, 3 H,  $\text{C}(\text{CH}_3)_2$ );  $^{13}\text{C}$  NMR (100.5 MHz,  $\text{CDCl}_3$ , 313 K,  $\delta$  ppm)  $\delta$  206.2 (CO of ketone), 154.1 (CO of carbamate), 113.4 ( $\text{C}(\text{CH}_3)_2$ ), 81.8 (C-5), \* 80.8 ( $\text{C}(\text{CH}_3)_3$ ), 78.0 (C-6), \* 68.0 (C-1), 59.2 (C-4), 39.3 (C-3), 28.2 ( $\text{C}(\text{CH}_3)_3$ ), 25.6, 24.4 ( $\text{C}(\text{CH}_3)_2$ ); CIMS  $m/z$  284 [30%,  $(\text{M}+\text{H})^+$ ],  $m/z$  268 [5%,  $(\text{M}-\text{Me})^+$ ],  $m/z$  228 [90%,  $(\text{M}-\text{Bu}^1+2\text{H})^+$ ],  $m/z$  184 [90%,  $(\text{M}-\text{Boc}+2\text{H})^+$ ]; HREIMS  $m/z$  found 283.1422, calcd for  $\text{C}_{14}\text{H}_{21}\text{NO}_5$  283.1420.

**(+)-7-*tert*-Butoxycarbonyl-5,6-*exo*-isopropylidenedioxy-7-azabicyclo[2.2.1]hept-2-one ((+)-3).**

This compound was prepared in the way described for (-)-**3**, except that pure (+)-**9** (method a) and (+)-**12** (method b) were used. Pure (+)-**3** was obtained in 90% (method a) and 92% (method b) yield. Mp =  $86-88^\circ\text{C}$ ;  $[\alpha]_D +50.0$  ( $c$  0.86,  $\text{CH}_2\text{Cl}_2$ ),  $[\alpha]_{577} +52.6$ ,  $[\alpha]_{546} +64.2$ ,  $[\alpha]_{435} +177$ ,  $[\alpha]_{405} +273$ .

**(-)-7-*tert*-Butoxycarbonyl-2-[(*tert*-butyl)dimethylsilyl]oxy-5,6-*exo*-isopropylidenedioxy-7-azabicyclo[2.2.1]hept-2-ene ((-)-14).**  $[\alpha]_D -38.2$  ( $c$  1.1,  $\text{CHCl}_3$ ),  $[\alpha]_{577} -40.2$ ,  $[\alpha]_{546} -45.7$ ,  $[\alpha]_{435} -82.5$ ,

$[\alpha]_{405} -102$ ; IR  $\nu_{\max}$  2933, 2860, 1709, 1619, 1368, 1310, 1257, 1177, 1161, 1099, 841  $\text{cm}^{-1}$ ;  $^1\text{H}$  NMR (400 MHz,  $\text{CDCl}_3$ , 298 K,  $\delta$  ppm,  $J$  Hz, mixture of rotamers)  $\delta$  4.86, 4.79 (2 bs, 1 H, H-3), 4.55, 4.46 (2 bs, 1 H, H-4), 4.46 (d, 1 H,  $J_{5,6} = 5.4$ , H-5),\* 4.38 (d, 1 H, H-6),\* 4.26, 4.15 (2 bs, 1 H, H-1), 1.43, (s, 12 H,  $(\text{CH}_3)_3\text{C}$ ,  $(\text{CH}_3)_2\text{C}$ ), 1.30 (s, 3 H,  $(\text{C}(\text{CH}_3)_2)$ ), 0.89, 0.88 (2 bs, 9 H,  $(\text{CH}_3)_3\text{C-Si}$ ), 0.15, 0.12 (2 s, 6 H,  $(\text{CH}_3)_2\text{Si}$ );  $^{13}\text{C}$  NMR (100.5 MHz,  $\text{CDCl}_3$ , 298 K,  $\delta$  ppm, mixture of rotamers)  $\delta$  162.9, 161.7 (1 C, C-2), 155.0, 154.9 (1 C, CO), 116.2, 116.1 (1C,  $\text{C}(\text{CH}_3)_3$ ), 104.5, 103.1 (1 C, C-3), 83.0, 82.5 (1 C, C-5),\* 80.3, 80.0 (1 C, C-6),\* 80.2 (1 C,  $(\text{CH}_3)_3\text{C}$ ), 65.4, 64.7 (1 C, C-1), 63.4, 62.8 (1 C, C-4), 28.7 (3 C,  $(\text{CH}_3)_3\text{C}$ ), 26.7 (1 C,  $(\text{CH}_3)_2\text{C}$ ), 25.9 (3 C,  $(\text{CH}_3)_3\text{CSi}$ ), 25.7, 25.6 (1 C,  $(\text{CH}_3)_2\text{C}$ ), 18.5 (1 C,  $(\text{CH}_3)_3\text{CSi}$ ), -4.4, -4.5 (1 C,  $(\text{CH}_3)_2\text{Si}$ ), -4.6, -4.7 (1 C,  $(\text{CH}_3)_2\text{Si}$ ); CIMS  $m/z$  398 [20%,  $(\text{M}+\text{H})^+$ ],  $m/z$  342 [19%,  $(\text{M-Bu}^1+2\text{H})^+$ ],  $m/z$  297 [57%,  $(\text{M-Boc}+\text{H})^+$ ]; Analysis, calcd for  $\text{C}_{20}\text{H}_{35}\text{NSiO}_5$ : C, 60.42; H, 8.87; N, 3.52; Found: C, 60.22; H, 8.96; N, 3.46.

**(+)-7-*tert*-Butoxycarbonyl-2-[(*tert*-butyl)dimethylsilyl]oxy-5,6-*exo*-isopropylidenedioxy-7-azabicyclo[2.2.1]hept-2-ene ((+)-14).** This compound was prepared in the manner described for (-)-14, except that pure (+)-3 was used. Pure (+)-16 was obtained in 84% yield.  $[\alpha]_{\text{D}} +36.6$  ( $c$  1.0,  $\text{CHCl}_3$ ),  $[\alpha]_{577} +38.3$ ,  $[\alpha]_{546} +44.7$ ,  $[\alpha]_{435} +82$ ,  $[\alpha]_{405} +99$ .

**D-2,3-*trans*-3,4-*cis*-4,5-*trans*-N-(*tert*-Butoxycarbonyl)-5-hydroxymethyl-3,4-isopropylidenedioxy-proline (Boc-D-Thyp(CMe<sub>2</sub>)-OH) ((-)-4).**  $[\alpha]_{\text{D}} -44$  ( $c$  0.8,  $\text{CHCl}_3$ ),  $[\alpha]_{577} -48$ ,  $[\alpha]_{546} -53.6$ ,  $[\alpha]_{435} -87.8$ ,  $[\alpha]_{405} -104$ ; IR  $\nu_{\max}$  3600-2400, 1676, 1587, 1408, 1382, 1257, 1216, 1171, 1136, 1063, 734  $\text{cm}^{-1}$ ;  $^1\text{H}$  NMR (400 MHz,  $\text{DMSO-}d_6$ , 373 K,  $\delta$  ppm,  $J$  Hz)  $\delta$  4.67 (dd, 1 H,  $J_{3,4} = 5.9$ ,  $J_{2,3} = 1.5$ , H-3), 4.64 (d, 1 H, H-4), 4.14 (bs, 1 H, H-2), 3.92 (t, 1 H, H-5), 3.72 (dd, 1 H,  $^2J_{\text{Ha,Hb}} = 11.4$ ,  $J_{5,\text{Ha}} = 4.3$ ,  $\text{CH}_a\text{OH}$ ), 3.44 (dd, 1 H,  $J_{5,\text{Hb}} = 3.2$ ,  $\text{CH}_b\text{OH}$ ), 1.40 (s, 9 H,  $(\text{CH}_3)_3\text{C}$ ), 1.38, 1.29 (2 s, 3 H each,  $(\text{C}(\text{CH}_3)_2)$ );  $^{13}\text{C}$  NMR (100.5 MHz,  $\text{DMSO-}d_6$ , 373 K,  $\delta$  ppm)  $\delta$  173.9 (COOH), 153.2 (CO), 110.2 ( $\text{C}(\text{CH}_3)_2$ ), 83.0 (C-3), 81.7 (C-4), 77.6 ( $\text{C}(\text{CH}_3)_3$ ), 68.4 ( $\text{CH}_2\text{OH}$ ), 66.0 (C-2), 60.8 (C-5), 27.2 ( $\text{C}(\text{CH}_3)_3$ ), 26.1, 24.3 ( $\text{C}(\text{CH}_3)_2$ ); CIMS  $m/z$  318 [5%,  $(\text{M}+\text{H})^+$ ],  $m/z$  279 [5%,  $(\text{M-Bu}^1+\text{NH}_4+\text{H})^+$ ];  $m/z$  217 [20%,  $(\text{M-Boc}+2\text{H})^+$ ].

**L-2,3-trans-3,4-cis-4,5-trans-N-(tert-Butoxycarbonyl)-5-hydroxymethyl-3,4-isopropylidenedioxy-proline (Boc-L-Thyp(CMe<sub>2</sub>)-OH) ((+)-4).** This compound was prepared in the manner described for (-)-4 except that pure (+)-14 was used. Pure (+)-4 was obtained in 89% yield.  $[\alpha]_D^{25} +45$  (c 0.55, CHCl<sub>3</sub>),  $[\alpha]_{577}^{25} +50.7$ ,  $[\alpha]_{546}^{25} +54$ ,  $[\alpha]_{435}^{25} +86.3$ ,  $[\alpha]_{405}^{25} +98$ .

**meso-(2S,3S,4R,5R)-N-(tert-Butoxycarbonyl)-2,5-dihydroxymethyl-3,4-isopropylidenedioxy-pyrrolidine (15).** To a solution of Me<sub>2</sub>S.BH<sub>3</sub> complex (36  $\mu$ l, 0.36 mmol, 95% in dimethyl sulfide) in anhydrous THF (1 ml), is added a solution of (-)-4 (38 mg, 0.12 mmol) in anhydrous THF (1 ml). The mixture is heated under reflux for 2 h. Excess BH<sub>3</sub> is destroyed by dropwise addition of anhydrous MeOH. After removal of the solvent, the product is obtained as an oil that was purified by column chromatography on silica gel (CH<sub>2</sub>Cl<sub>2</sub>:MeOH, 50:1→20:1) to give **15** (21 mg, 59%) as a syrup. IR  $\nu_{\max}$  3402, 2980, 2936, 1673, 1404, 1370, 1171, 1063 cm<sup>-1</sup>; <sup>1</sup>H NMR (400 MHz, DMSO-*d*<sub>6</sub>, 363 K,  $\delta$  ppm, *J* Hz)  $\delta$  4.65 (s, 2 H, H-3 and H-4), 4.57 (bs, 2 H, OH), 3.85 (dd,  $J_{2,\text{CHa}} = J_{5,\text{CHa}} = 6.8$ ,  $J_{2,\text{CHb}} = J_{5,\text{CHb}} = 3.9$ , H-2 and H-5), 3.53 (dt, 1 H,  $^2J_{\text{CHa,CHb}} = 10.8$ ,  $J_{\text{CHa,OH}} = 4.7$ , CH<sub>a</sub>OH), 3.41 (m, 1H, CH<sub>b</sub>OH), 1.42 (s, 9 H, (CH<sub>3</sub>)<sub>3</sub>C), 1.38, 1.26 (2 s, 3 H each, C(CH<sub>3</sub>)<sub>2</sub>); <sup>13</sup>C NMR (100.5 MHz, DMSO-*d*<sub>6</sub>, 363 K,  $\delta$  ppm)  $\delta$  153.6 (CO), 110.1 (C(CH<sub>3</sub>)<sub>2</sub>), 81.4 (C-3 and C-4), 78.7 (C(CH<sub>3</sub>)<sub>3</sub>), 65.9 (C-2 and C-5), 61.1 (2 CH<sub>2</sub>OH), 27.8 (C(CH<sub>3</sub>)<sub>3</sub>), 26.8, 24.9 (C(CH<sub>3</sub>)<sub>2</sub>); CIMS *m/z* 304 [46%, (M+H)<sup>+</sup>], *m/z* 248 [100%, (M-Bu<sup>+</sup>+2H)<sup>+</sup>]; *m/z* 204 [55%, (M-Boc+2H)<sup>+</sup>].

**meso-(2S,3S,4R,5R)-2,5-Dihydroxymethyl-3,4-dihydroxypyrrolidine hydrochloride (16).**<sup>19</sup> Diol **15** (7 mg, 0.022 mmol) was dissolved in THF (0.5 ml)-HCl 1M (0.5 ml) and the mixture was stirred at 90 °C for 6 h. The solvent was evaporated and the excess HCl removed *in vacuo* to give **16** (4 mg, 100%) as a white foam.

**H-L-Thyp(CMe<sub>2</sub>)-Gly-OBn (17).** To a solution of compound (+)-4 (135 mg, 0.428 mmol) in dry DMF (3 ml), glycine benzyl ester *p*-toluenesulfonate (181 mg, 0.535 mmol), diisopropylethylamine (234  $\mu$ l, 1.284 mmol) and PyBOP (274 mg, 0.535 mmol) were added. The solution was stirred for 1 h.,

then evaporated to dryness. The crude was dissolved in  $\text{CH}_2\text{Cl}_2$ , washed with saturated aqueous solution of citric acid and brine, and the organic layer was dried ( $\text{MgSO}_4$ ) and concentrated *in vacuo*. The corresponding residue was purified by flash chromatography using ether as eluent to give Boc-L-Thyp(CMe<sub>2</sub>)-Gly-OBn (159 mg, 0.34 mmol, 80% yield) as a white solid. Dipeptide Boc-L-Thyp(CMe<sub>2</sub>)-Gly-OBn was dissolved in TFA (20%)-DCM (4 ml) and the mixture was stirred for 30 min. Then, the solution was concentrated to dryness and the crude co-evaporated with  $\text{Et}_3\text{N}$ . The corresponding residue was purified by flash chromatography ( $\text{CH}_2\text{Cl}_2$ :MeOH, 30:1) to give **17** (97 mg, 0.267 mmol, 78% yield) as a colorless oil.  $[\alpha]_{\text{D}} +6.6$  (*c* 1.25,  $\text{CH}_3\text{OH}$ ),  $[\alpha]_{577} +5.8$ ,  $[\alpha]_{546} +7.5$ ,  $[\alpha]_{435} +12.6$ ,  $[\alpha]_{405} +13.7$ ; IR  $\nu_{\text{max}}$  3337, 2987, 2935, 1748, 1654, 1522, 1382, 1211  $\text{cm}^{-1}$ ;  $^1\text{H}$  NMR (400 MHz,  $\text{CD}_3\text{OD}$ , 298 K,  $\delta$  ppm, *J* Hz)  $\delta$  7.41-7.35 (m, 5 H, H-aromat.), 5.21 (d, 1 H,  $^2J_{\text{H,H}} = 12.2$ ,  $\text{CH}_2\text{Ph}$ ), 5.18 (d, 1 H,  $\text{CH}_2\text{Ph}$ ), 4.84 (dd, 1 H,  $J_{3,4} = 5.8$ ,  $J_{2,3} = 2.4$ , H-3), 4.50 (dd, 1 H,  $J_{4,5} = 2.0$ , H-4), 4.10 (d, 1 H,  $^2J_{\text{H,H}} = 17.7$ , H-1'a), 3.97 (d, 1 H, H-1'b), 3.80 (d, 1 H, H-2), 3.50 (d, 2 H,  $J_{5,6} = 6.0$ , H-6a and H-6b), 3.37 (td, 1 H, H-5), 1.51, 1.33 (2 s, 3 H each,  $\text{C}(\text{CH}_3)_2$ );  $^{13}\text{C}$  NMR (100.5 MHz,  $\text{CD}_3\text{OD}$ , 298 K,  $\delta$  ppm)  $\delta$  176.8 (COOBn), 172.1 (CONHR), 138.0, 130.5, 130.3, 130.2 (6 C, C-aromat.), 114.3 ( $\text{C}(\text{CH}_3)_2$ ), 87.0 (C-3), 85.4 (C-4), 70.1 (C-2), 68.9 ( $\text{CH}_2\text{Ph}$ ), 68.3 (C-5), 64.6 (C-6), 42.8 (C-1'), 28.2, 25.9 ( $(\text{CH}_3)_2\text{C}$ ); CIMS *m/z* 365 [100%, (M+H)<sup>+</sup>]; HRCIMS *m/z* found 365.1719, calcd for  $\text{C}_{18}\text{H}_{24}\text{N}_2\text{O}_6 + \text{H}$  365.1726.

**H-L-Phe-L-Thyp-Gly-OBn (19).**  $[\alpha]_{\text{D}} +36.2$  (*c* 0.65,  $\text{CH}_3\text{OH}$ ),  $[\alpha]_{577} +34.9$ ,  $[\alpha]_{546} +41.5$ ,  $[\alpha]_{435} +72.0$ ,  $[\alpha]_{405} +84.5$ ; IR  $\nu_{\text{max}}$  3298, 2937, 1748, 1652, 1558, 1456, 1213, 1055  $\text{cm}^{-1}$ ;  $^1\text{H}$  NMR (400 MHz,  $\text{CD}_3\text{OD}$ , 298 K,  $\delta$  ppm, *J* Hz, mixture of rotamers) *Major rotamer*:  $\delta$  7.41-7.20 (m, H-aromat.), 5.21 (s, 2 H,  $\text{CH}_2\text{Ph}$ ), 4.81 (dd, 1 H,  $J_{3,4} = 5.8$ ,  $J_{2,3} = 2.2$ , H-3), 4.70 (br. d, 1 H, H-4), 4.32 (t, 1 H,  $J_{1'',2''} = 3.9$ , H-1''), 4.25 (d, 1 H, H-2), 4.10 (d, 1 H,  $^2J_{\text{H,H}} = 17.5$ , H-1'a), 4.05 (d, 1 H, H-1'b), 3.88 (dd, 1 H,  $^2J_{\text{H,H}} = 11.5$ ,  $J_{2\text{a}'',1''} = 4.8$ , H-2''a), 3.70 (dd, 1 H,  $J_{2''\text{b},1''} = 3.1$ , H-2''b), 3.67 (dd, 1 H,  $J_{5,6\text{a}} = 8.2$ ,  $J_{5,6\text{b}} = 5.8$ , H-5), 2.99 (dd, 1 H,  $J_{6\text{a},6\text{b}} = 13.2$ , H-6a), 2.85 (dd, 1 H, H-6b), 1.28, 1.26 (2 s, 3 H each,  $\text{C}(\text{CH}_3)_2$ ). *Minor rotamer*:  $\delta$  7.41-7.20 (m, H-aromat.), 5.21 (s, 2 H,  $\text{CH}_2\text{Ph}$ ), 4.85 (dd, 1 H,  $J_{3,4} = 5.7$ ,  $J_{2,3} = 2.7$ , H-3), 4.68

(d, 1 H, H-4), 4.66 (d, 1 H, H-2), 4.42 (t, 1 H,  $J_{1'',2''} = 4.9$ , H-1''), 4.06 (d, 1 H,  $^2J_{H,H} = 17.6$ , H-1'a), 3.99 (d, 1 H, H-1'b), 3.91-3.89 (m, 1 H, H-5), 3.32 (dd, 1 H, H-2''a), 3.24 (dd, 1 H,  $^2J_{H,H} = 11.9$ ,  $J_{2b'',1''} = 5.3$ , H-2''b), 3.14 (dd, 1 H,  $J_{6a,6b} = 12.8$ ,  $J_{5,6a} = 7.4$ , H-6a), 2.81 (dd, 1 H,  $J_{5,6b} = 6.5$ , H-6b), 1.47, 1.33 (2 s, 3 H each,  $(C(CH_3)_2)$ ).  $^{13}C$  NMR (100.5 MHz,  $CD_3OD$ , 298 K,  $\delta$  ppm, mixture of rotamers) *Major rotamer*:  $\delta$  177.3 (COOBn), 174.6 (CONR'R''), 171.8 (CONHR), 139.7-128.7 (12 C, C-aromat.), 114.2 ( $C(CH_3)_2$ ), 85.8 (C-3), 83.3 (C-4), 70.9 (C-2), 68.9 (COOCH<sub>2</sub>Ph), 68.3 (C-1''), 62.3 (C-2''), 56.3 (C-5), 43.1 (C-1'), 42.6 (C-6), 28.5, 26.2 ( $(CH_3)_2C$ ). *Minor rotamer*:  $\delta$  177.6 (COOBn), 174.3 (CONR'R''), 171.6 (CONHR), 139.0-128.7 (12 C, C-aromat.), 114.2 ( $C(CH_3)_2$ ), 84.9 (C-4), 83.8 (C-3), 70.4 (C-2), 68.9 (COOCH<sub>2</sub>Ph), 67.9 (C-1''), 64.3 (C-2''), 55.9 (C-5), 43.7 (C-1'), 43.1 (C-6), 28.4, 26.2 ( $(CH_3)_2C$ ); CIMS  $m/z$  512 [100%, (M+H)<sup>+</sup>]; HRCIMS  $m/z$  found 512.2401, calcd for  $C_{27}H_{33}N_3O_7 + H$  512.2397.

**H-D-Thyp-L-Val-OBn (20).** To a solution of compound (-)-**4** (55 mg, 0.173 mmol) in dry DMF (1.5 ml), L-valine benzyl ester *p*-toluenesulfonate (84 mg, 0.223 mmol), diisopropylethylamine (93  $\mu$ l, 0.51 mmol) and PyAOP (117 mg, 0.225 mmol) were added. The solution was stirred for 1 h., then evaporated to dryness. The crude was dissolved in  $CH_2Cl_2$ , washed with saturated aqueous solution of citric acid and brine, and the organic layer was dried over  $MgSO_4$  and concentrated. The residue was purified by flash chromatography using ether as eluent to give Boc-D-Thyp(CMe<sub>2</sub>)-L-Val-OBn (65 mg, 0.128 mmol, 74% yield) as a white solid. Dipeptide Boc-D-Thyp-L-Val-OBn was dissolved in TFA (80%)-H<sub>2</sub>O (3 ml) and the mixture was stirred for 2 h. Then, the solution was concentrated to dryness and the corresponding residue was purified by flash chromatography ( $CH_2Cl_2$ :MeOH, 30:1) to give **20** (55 mg, 89% yield) as a colorless oil.  $[\alpha]_D -7$  ( $c$  1.0,  $CH_3OH$ );  $^1H$  NMR (300 MHz,  $CD_3OD$ , 298 K,  $\delta$  ppm,  $J$  Hz)  $\delta$  7.38-7.29 (m, 5 H, H-aromat.), 5.21 (d, 1 H,  $^2J_{H,H} = 12.2$ ,  $CH_2Ph$ ), 5.15 (d, 1 H,  $CH_2Ph$ ), 4.46 (d, 1 H,  $J_{1',2'} = 5.61$ , H-1'), 4.26 (d, 1 H,  $J_{2,3} = 4.4$ , H-2), 4.23 (t, 1 H,  $J_{3,4} = 4.2$ , H-3), 4.01 (dd, 1 H,  $J_{4,5} = 6.4$ , H-4), 3.87 (dd, 1 H,  $J_{6a,6b} = 11.9$ ,  $J_{5,6a} = 4.0$ , H-6a), 3.81 (dd, 1 H,  $J_{5,6b} = 5.9$ , H-6b), 2.22 (m, 1 H, H-2'), 0.92 (d, 1 H,  $^3J_{H,H} = 5.64$ ,  $CH_3$ ), 0.89 (d, 1 H,  $^3J_{H,H} = 5.64$ ,  $CH_3$ );  $^{13}C$  NMR (75.4 MHz,



CD<sub>3</sub>OD, 298 K,  $\delta$  ppm)  $\delta$  172.4 (COOBn), 168.7 (CONHR), 137.0, 129.6, 129.5 (6 C, C-aromat.), 76.0 (C-3), 72.7 (C-4), 68.1 (CH<sub>2</sub>Ph), 65.6 (C-2), 64.9 (C-5), 59.7 (C-1'), 59.5 (C-6), 31.9 (C-2'), 19.5, 18.1 (2 CH<sub>3</sub>) ; FABMS  $m/z$  367 [40%, (M+H)<sup>+</sup>]; HRFABMS  $m/z$  367.1879, calcd for C<sub>18</sub>H<sub>26</sub>N<sub>2</sub>O<sub>6</sub> +H 367.1869.

**Fmoc-L-Ala-D-Thyp-L-Val-OBn (21).** To a solution of compound **20** (33 mg, 0.069 mmol) in dry DMF (1.5 ml), Fmoc-L-alanine (25 mg, 0.082 mmol), diisopropylethylamine (37  $\mu$ l, 0.21 mmol) and PyAOP (44 mg, 0.082 mmol) were added. The solution was stirred for 1 h., then evaporated to dryness. The crude was dissolved in CH<sub>2</sub>Cl<sub>2</sub>, washed with saturated aqueous solution of citric acid and brine, and the organic layer was dried over MgSO<sub>4</sub> and concentrated. The corresponding residue was purified by flash chromatography (CH<sub>2</sub>Cl<sub>2</sub>:MeOH, 30:1) to give **21** (33 mg, 70% yield) as a white solid. Compound **21** was characterized as the unprotected tripeptide **22**.

**H-L-Phe-D-Thyp-L-Val-OBn (22).** Tripeptide **21** (33 mg, 0.048 mmol) was dissolved in CH<sub>2</sub>Cl<sub>2</sub> (3 ml) and Et<sub>3</sub>NH (0.3 ml) was added. The mixture was stirred for 30 min, then the solution was concentrated to dryness and the crude was purified by flash chromatography (CH<sub>2</sub>Cl<sub>2</sub>:MeOH, 5:1) to give **22** (19 mg, 90%) as a colorless oil.  $[\alpha]_D^{25}$  -11 (c 0.37, CH<sub>3</sub>OH); <sup>13</sup>C NMR (100.5 MHz, CD<sub>3</sub>OD, 298 K,  $\delta$  ppm, mixture of rotamers 1:1)  $\delta$  173.8, 173.5, 172.6 (COOBn, CONHR, CONHR'R''), 137.2, 130.0, 129.6, 129.5, 129.4, 129.3 (C-aromat.), 76.6, 75.3, 74.5, 72.3 (C-3, C-4), 68.9, 67.3 (C-2), 67.9, 67.8 (CH<sub>2</sub>Ph), 67.2, 66.3 (C-5), 62.5, 59.9 (C-6), 60.0, 59.3 (NHCH of Val), 49.6-48.3 (CH of Ala, under MeOD), 32.0, 31.2 (CH(CH<sub>3</sub>)<sub>2</sub> of Val), 20.3, 19.2 (CH<sub>3</sub> of Ala), 19.6, 19.5 (CH<sub>3</sub> of Val), 18.7, 18.4 (CH<sub>3</sub> of Val); FABMS  $m/z$  460 [30%, (M+Na)<sup>+</sup>]; HRFABMS  $m/z$  460.2037, calcd for C<sub>21</sub>H<sub>31</sub>N<sub>3</sub>O<sub>7</sub> +Na 460.2060.

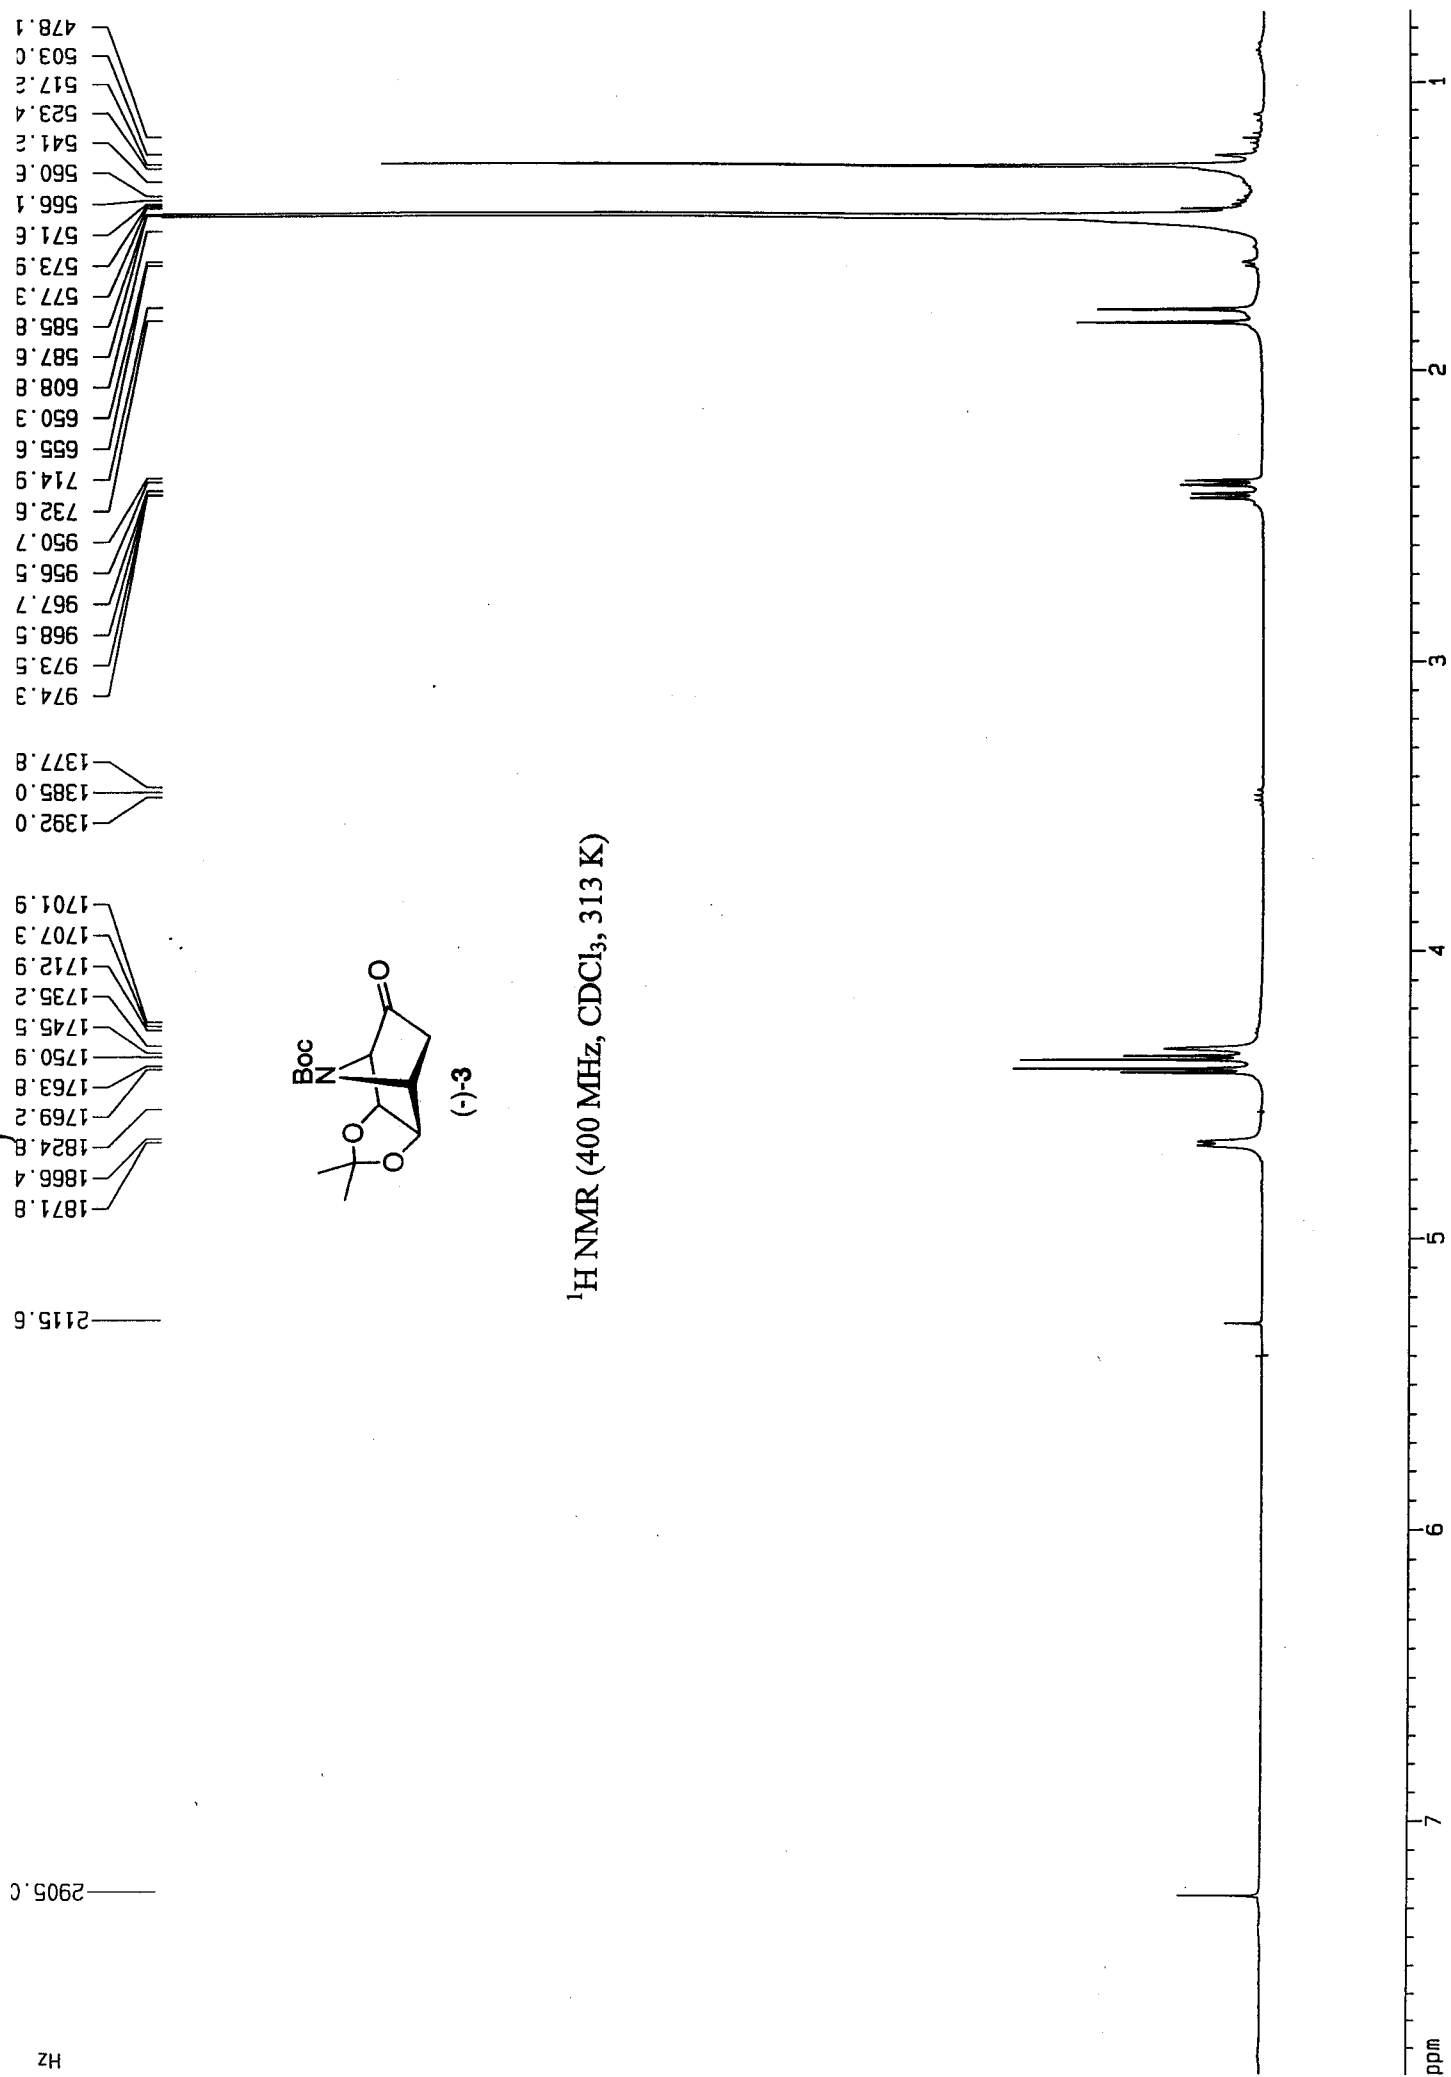

ppm

206.258

113.410

81.787  
80.801  
77.974  
77.282  
76.964  
76.647  
68.020  
59.199

39.306  
28.403  
28.301  
28.231  
28.198  
28.166  
25.596  
24.422

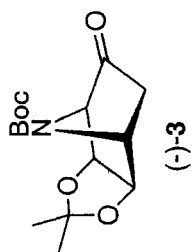

$^{13}\text{C}$  NMR (100.5 MHz,  $\text{CDCl}_3$ , 313 K)

ppm

200

180

160

140

120

100

80

60

40

20

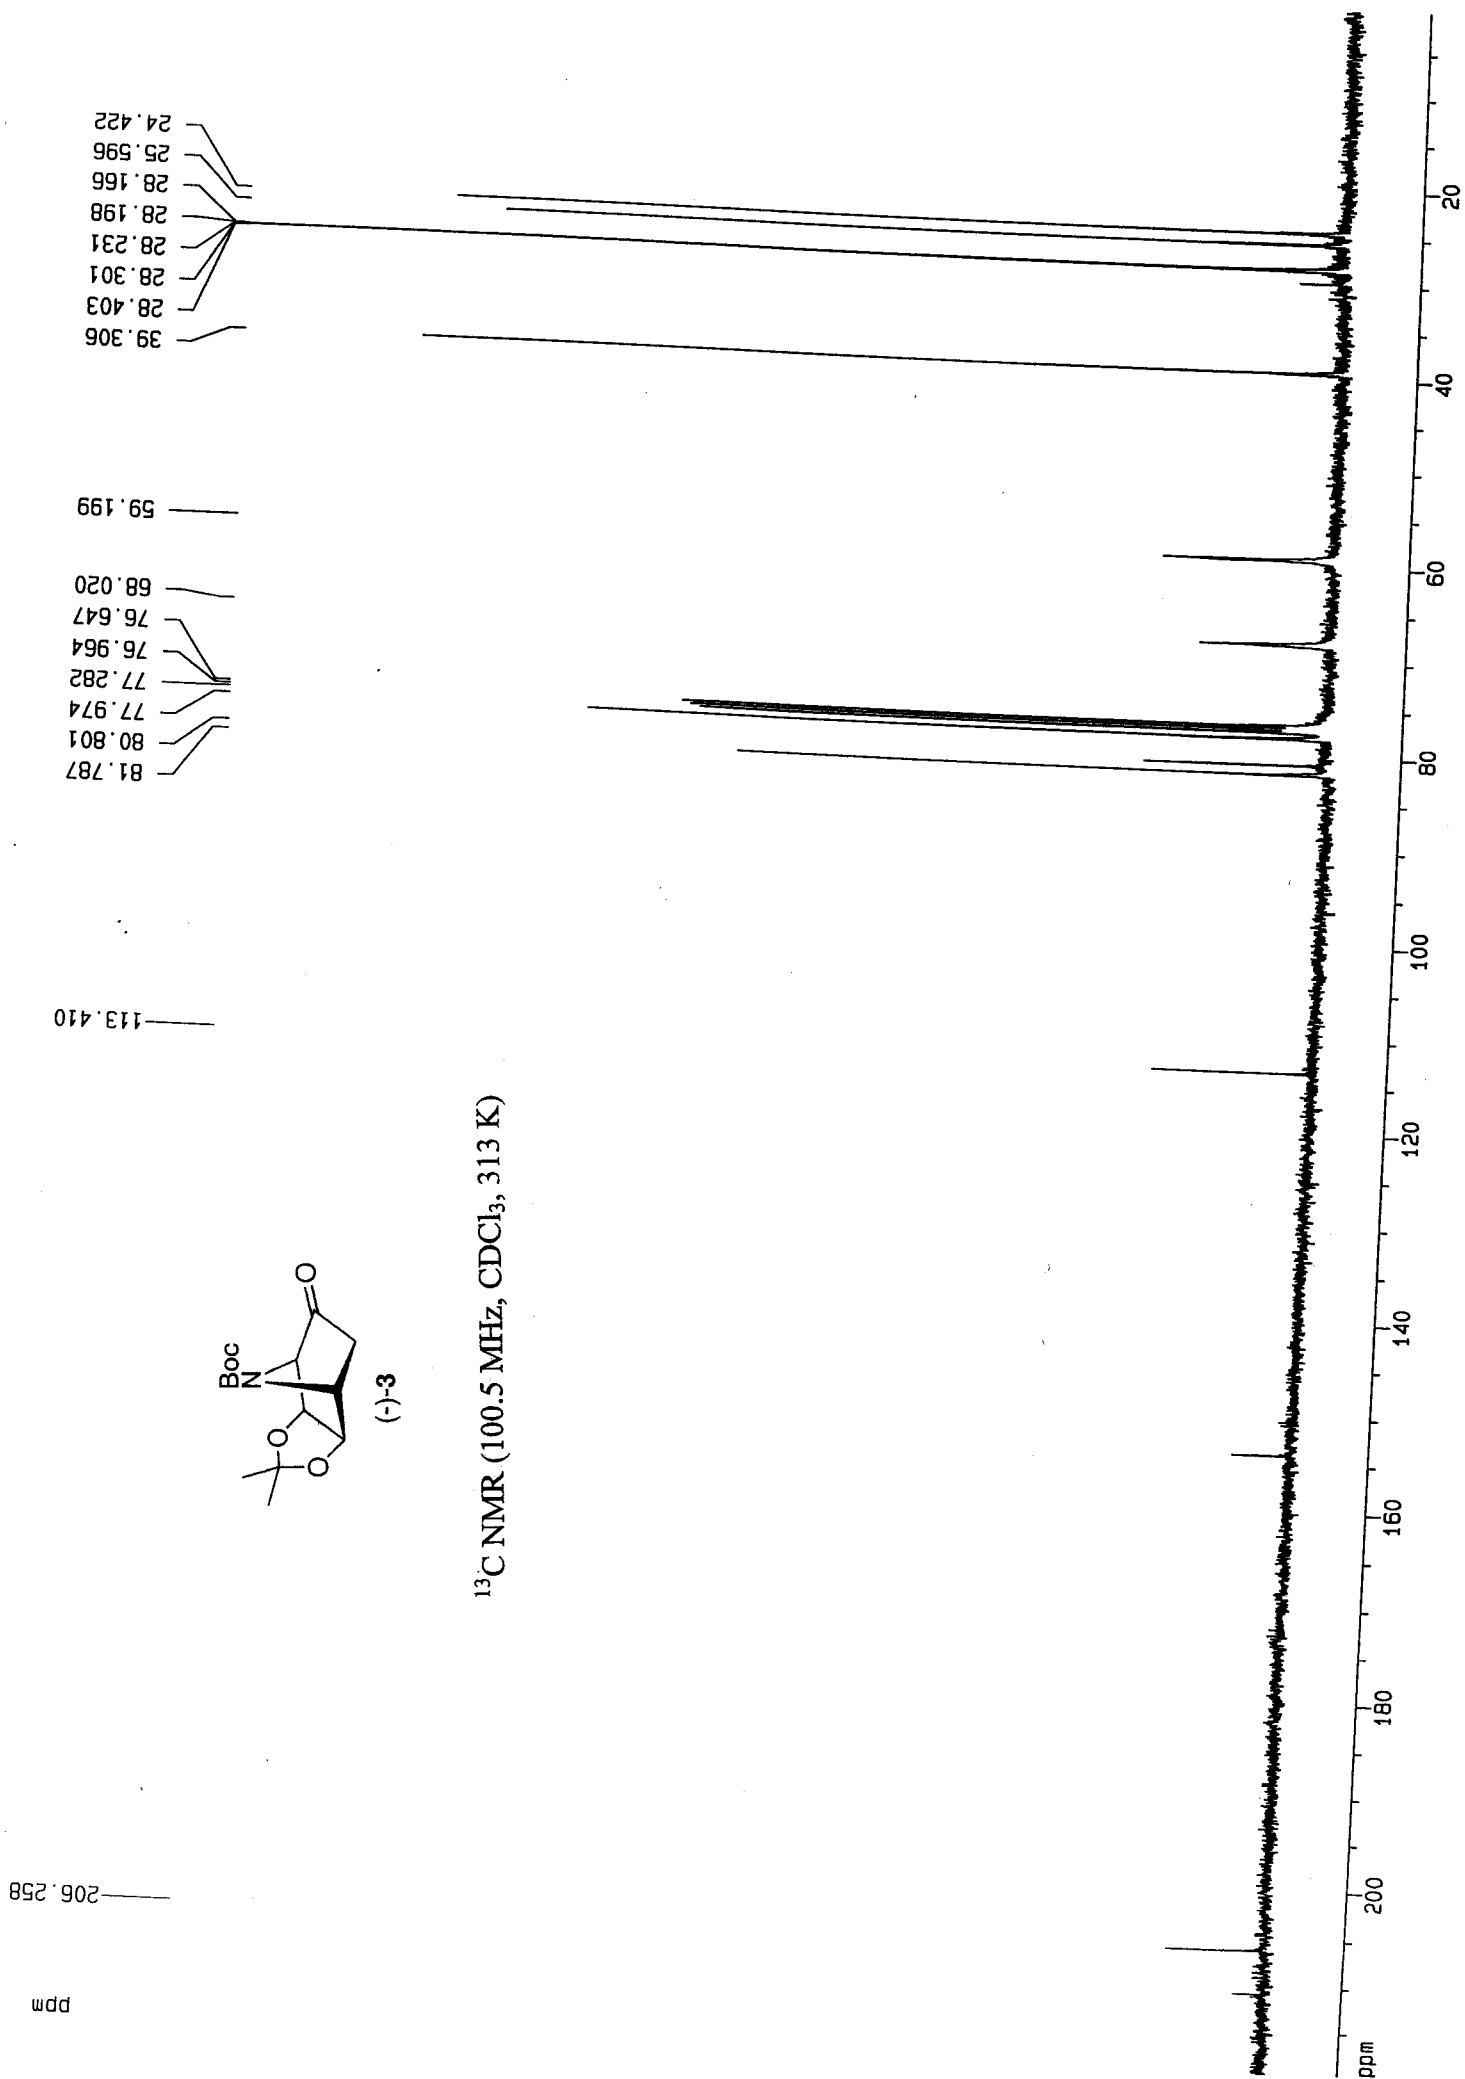

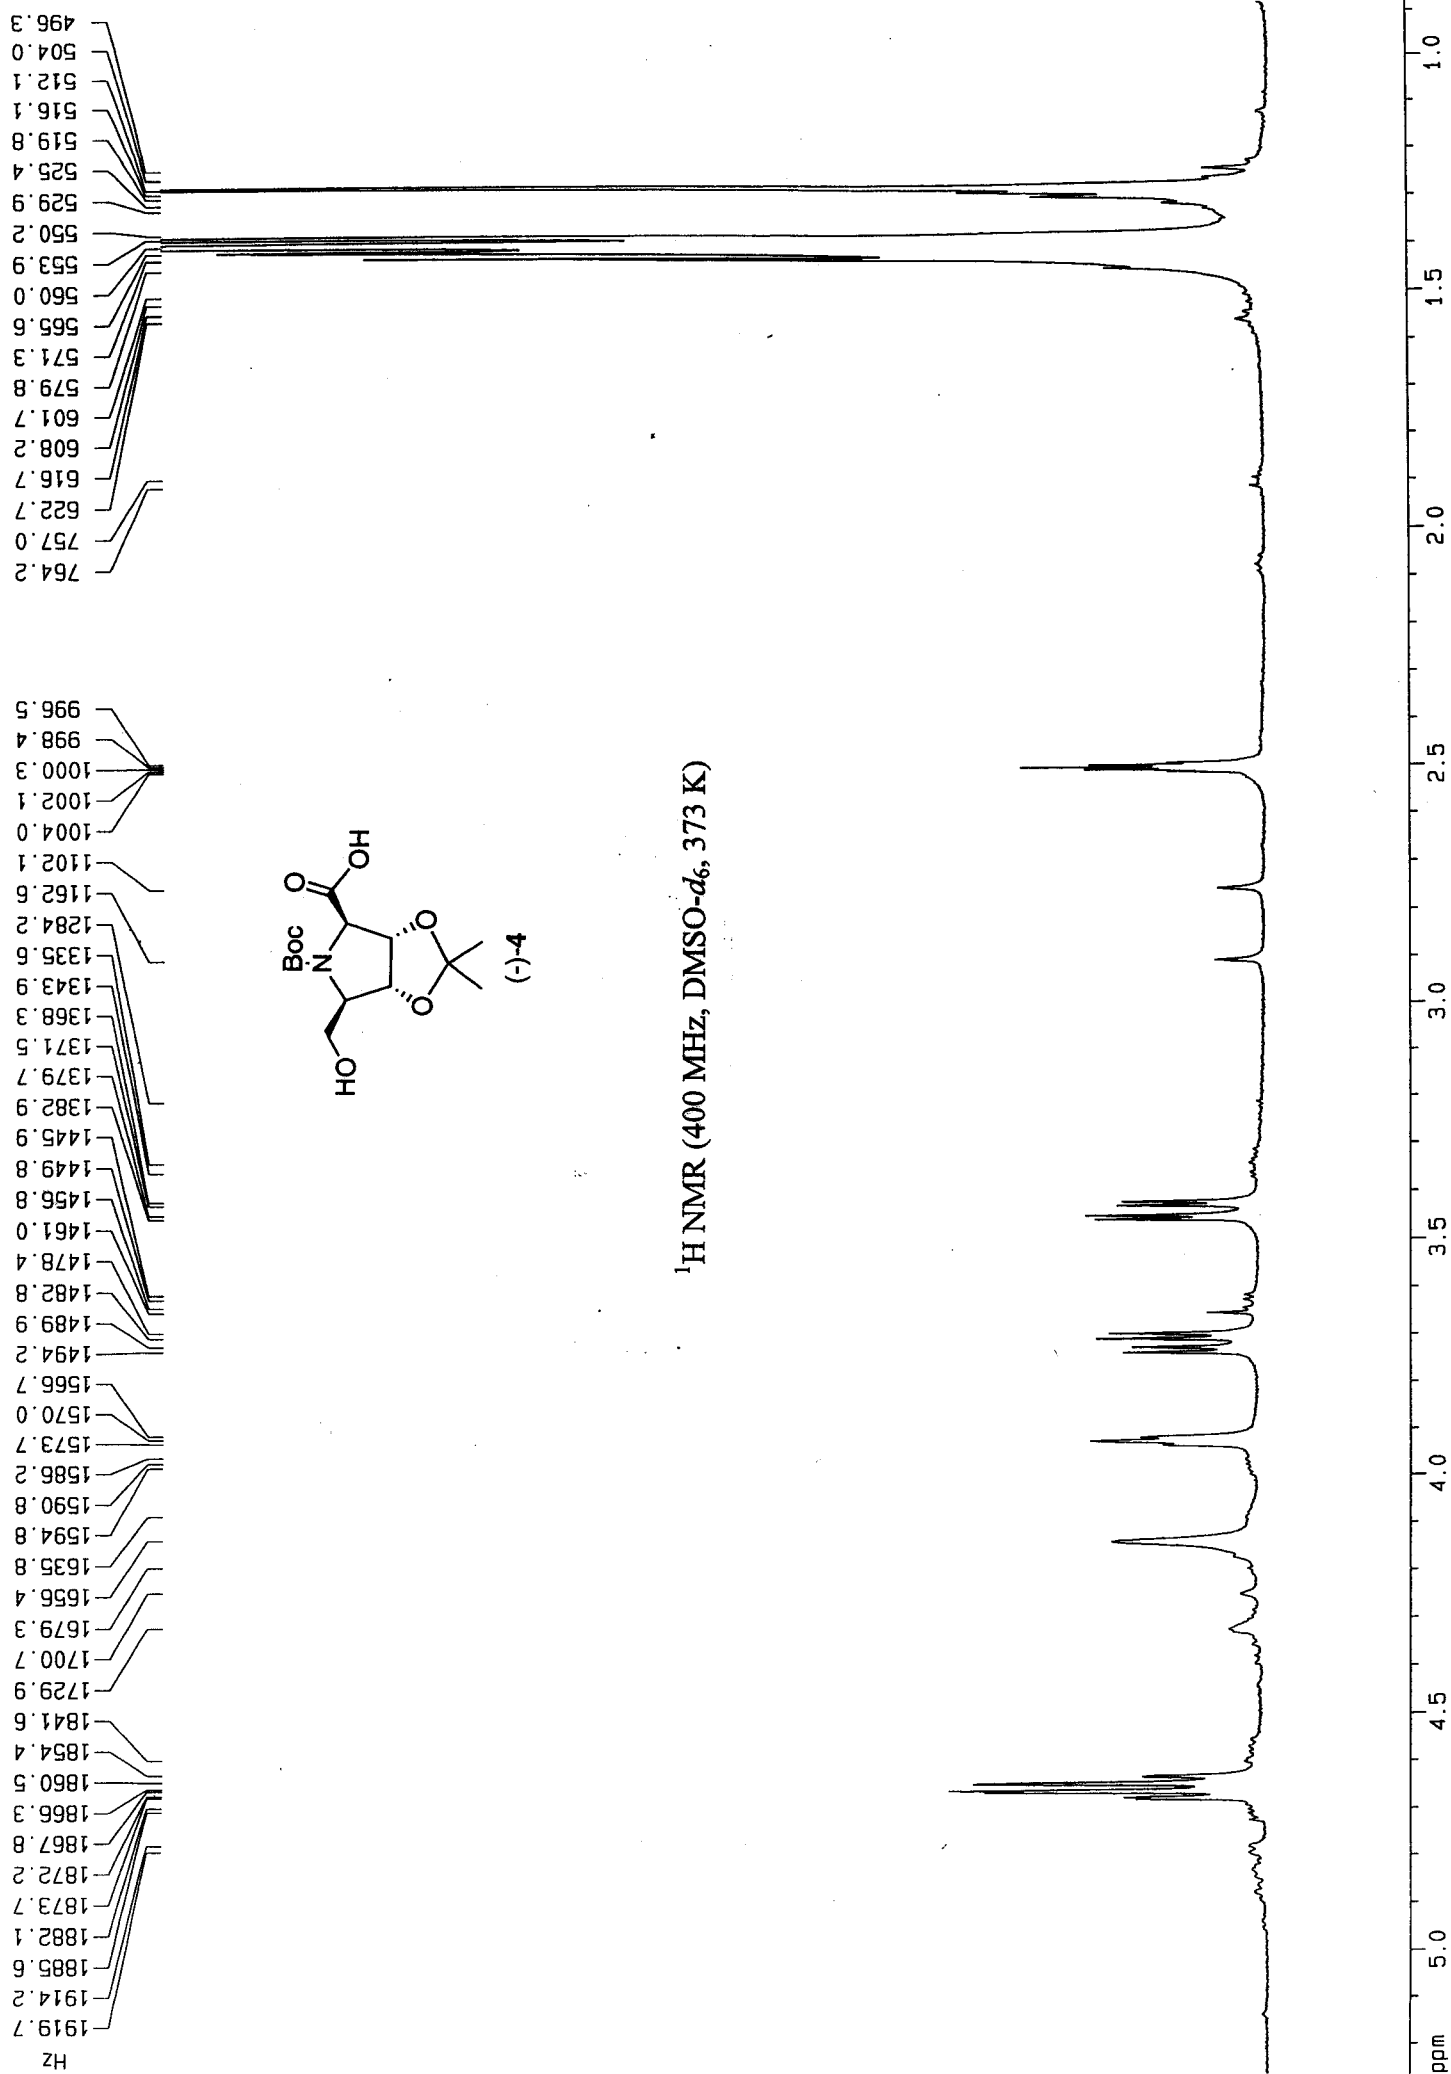

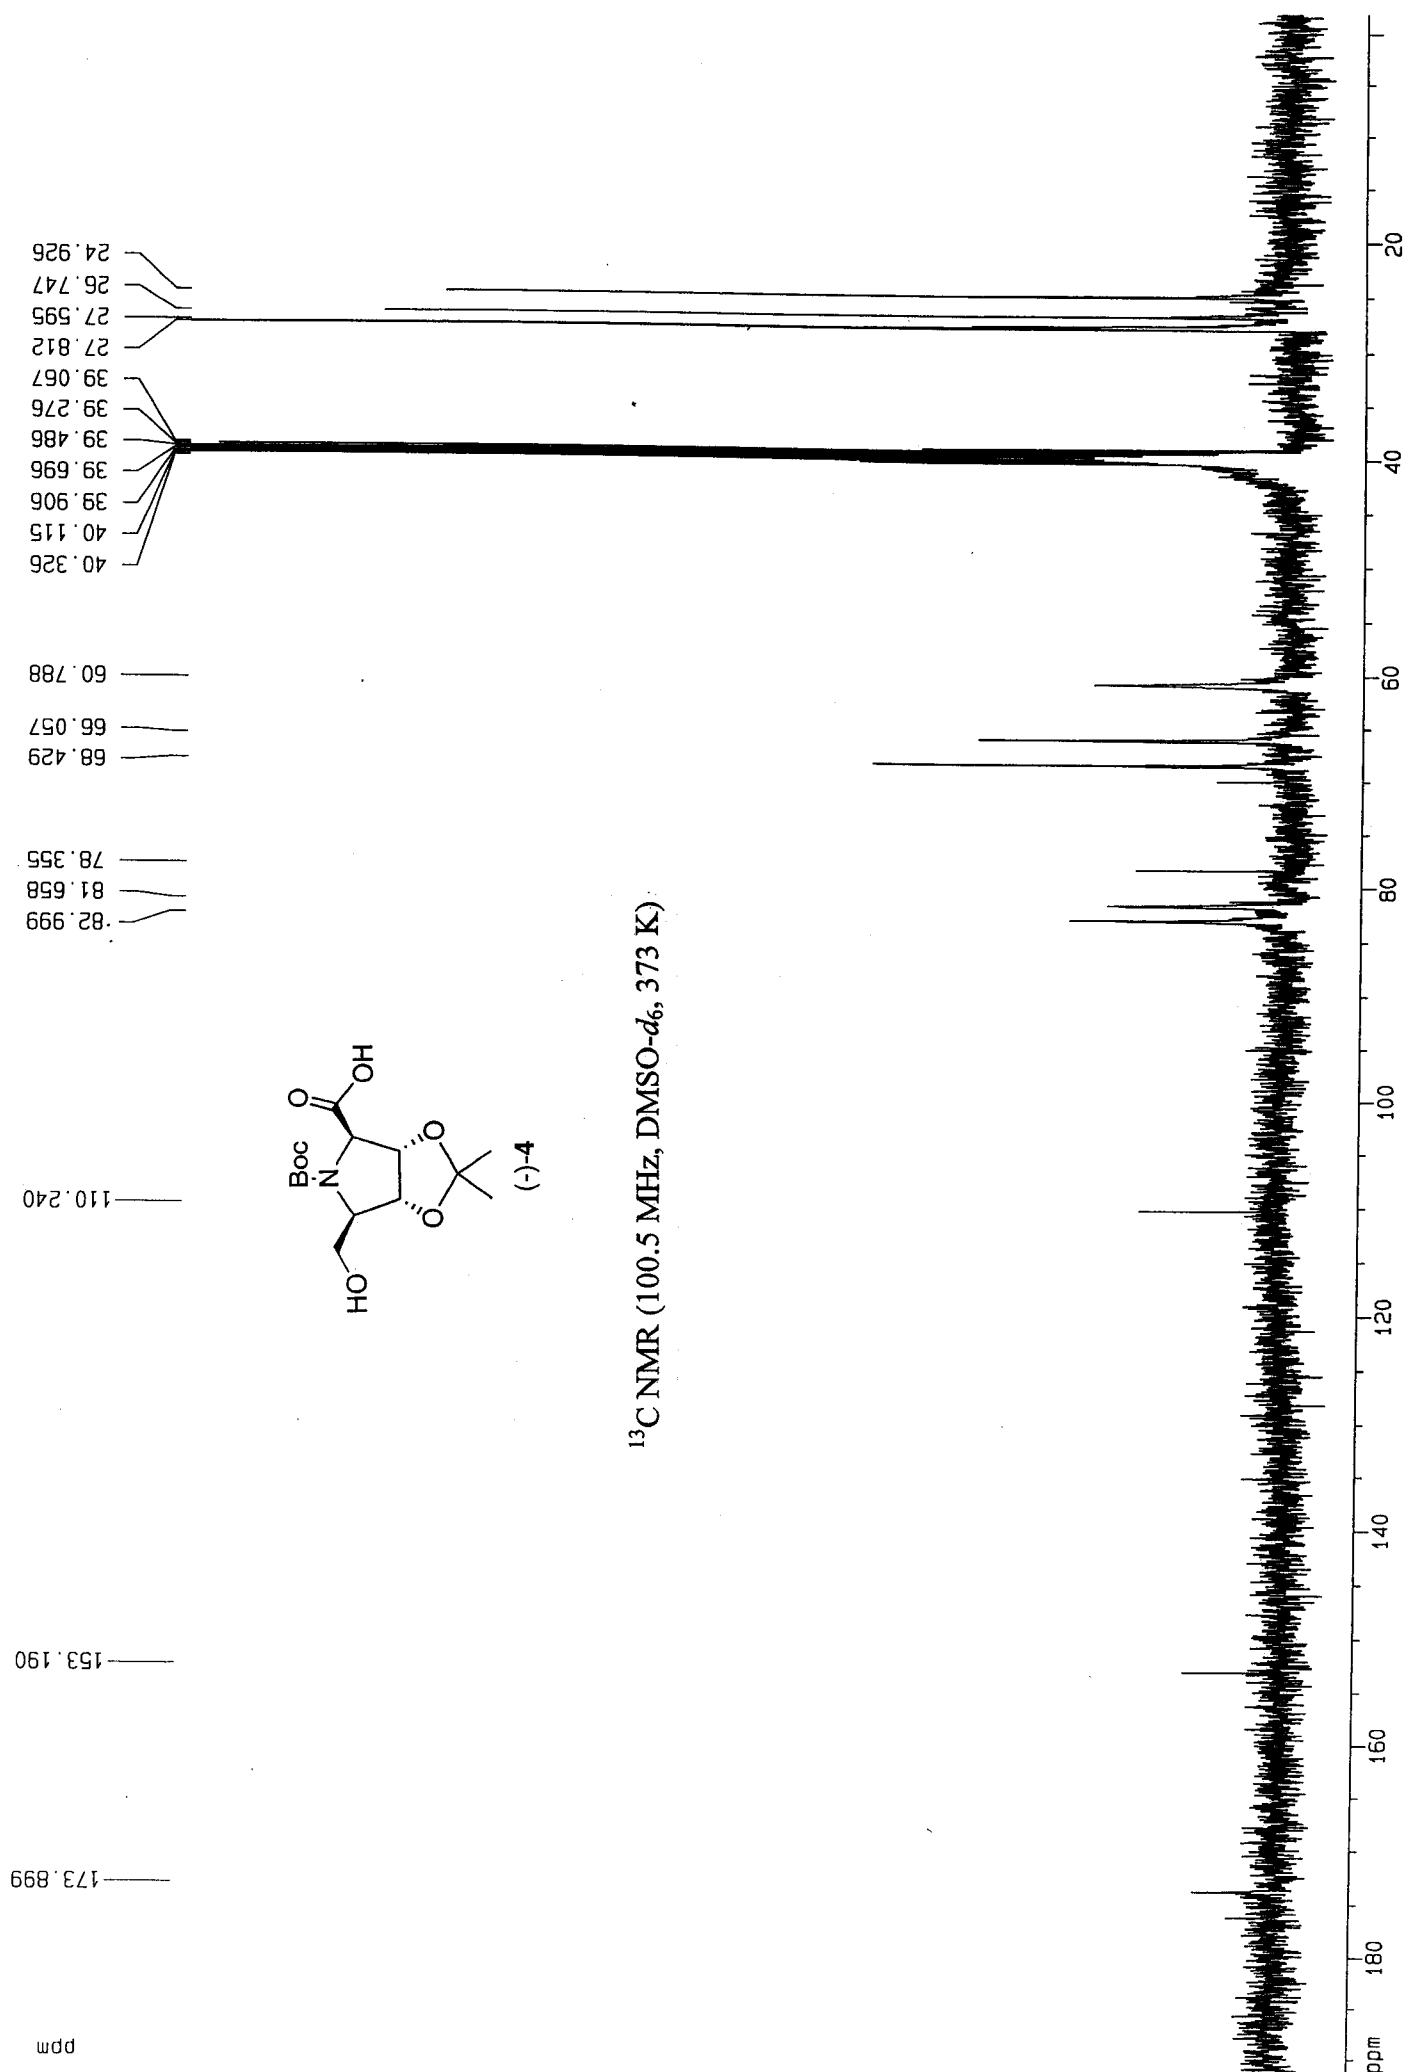

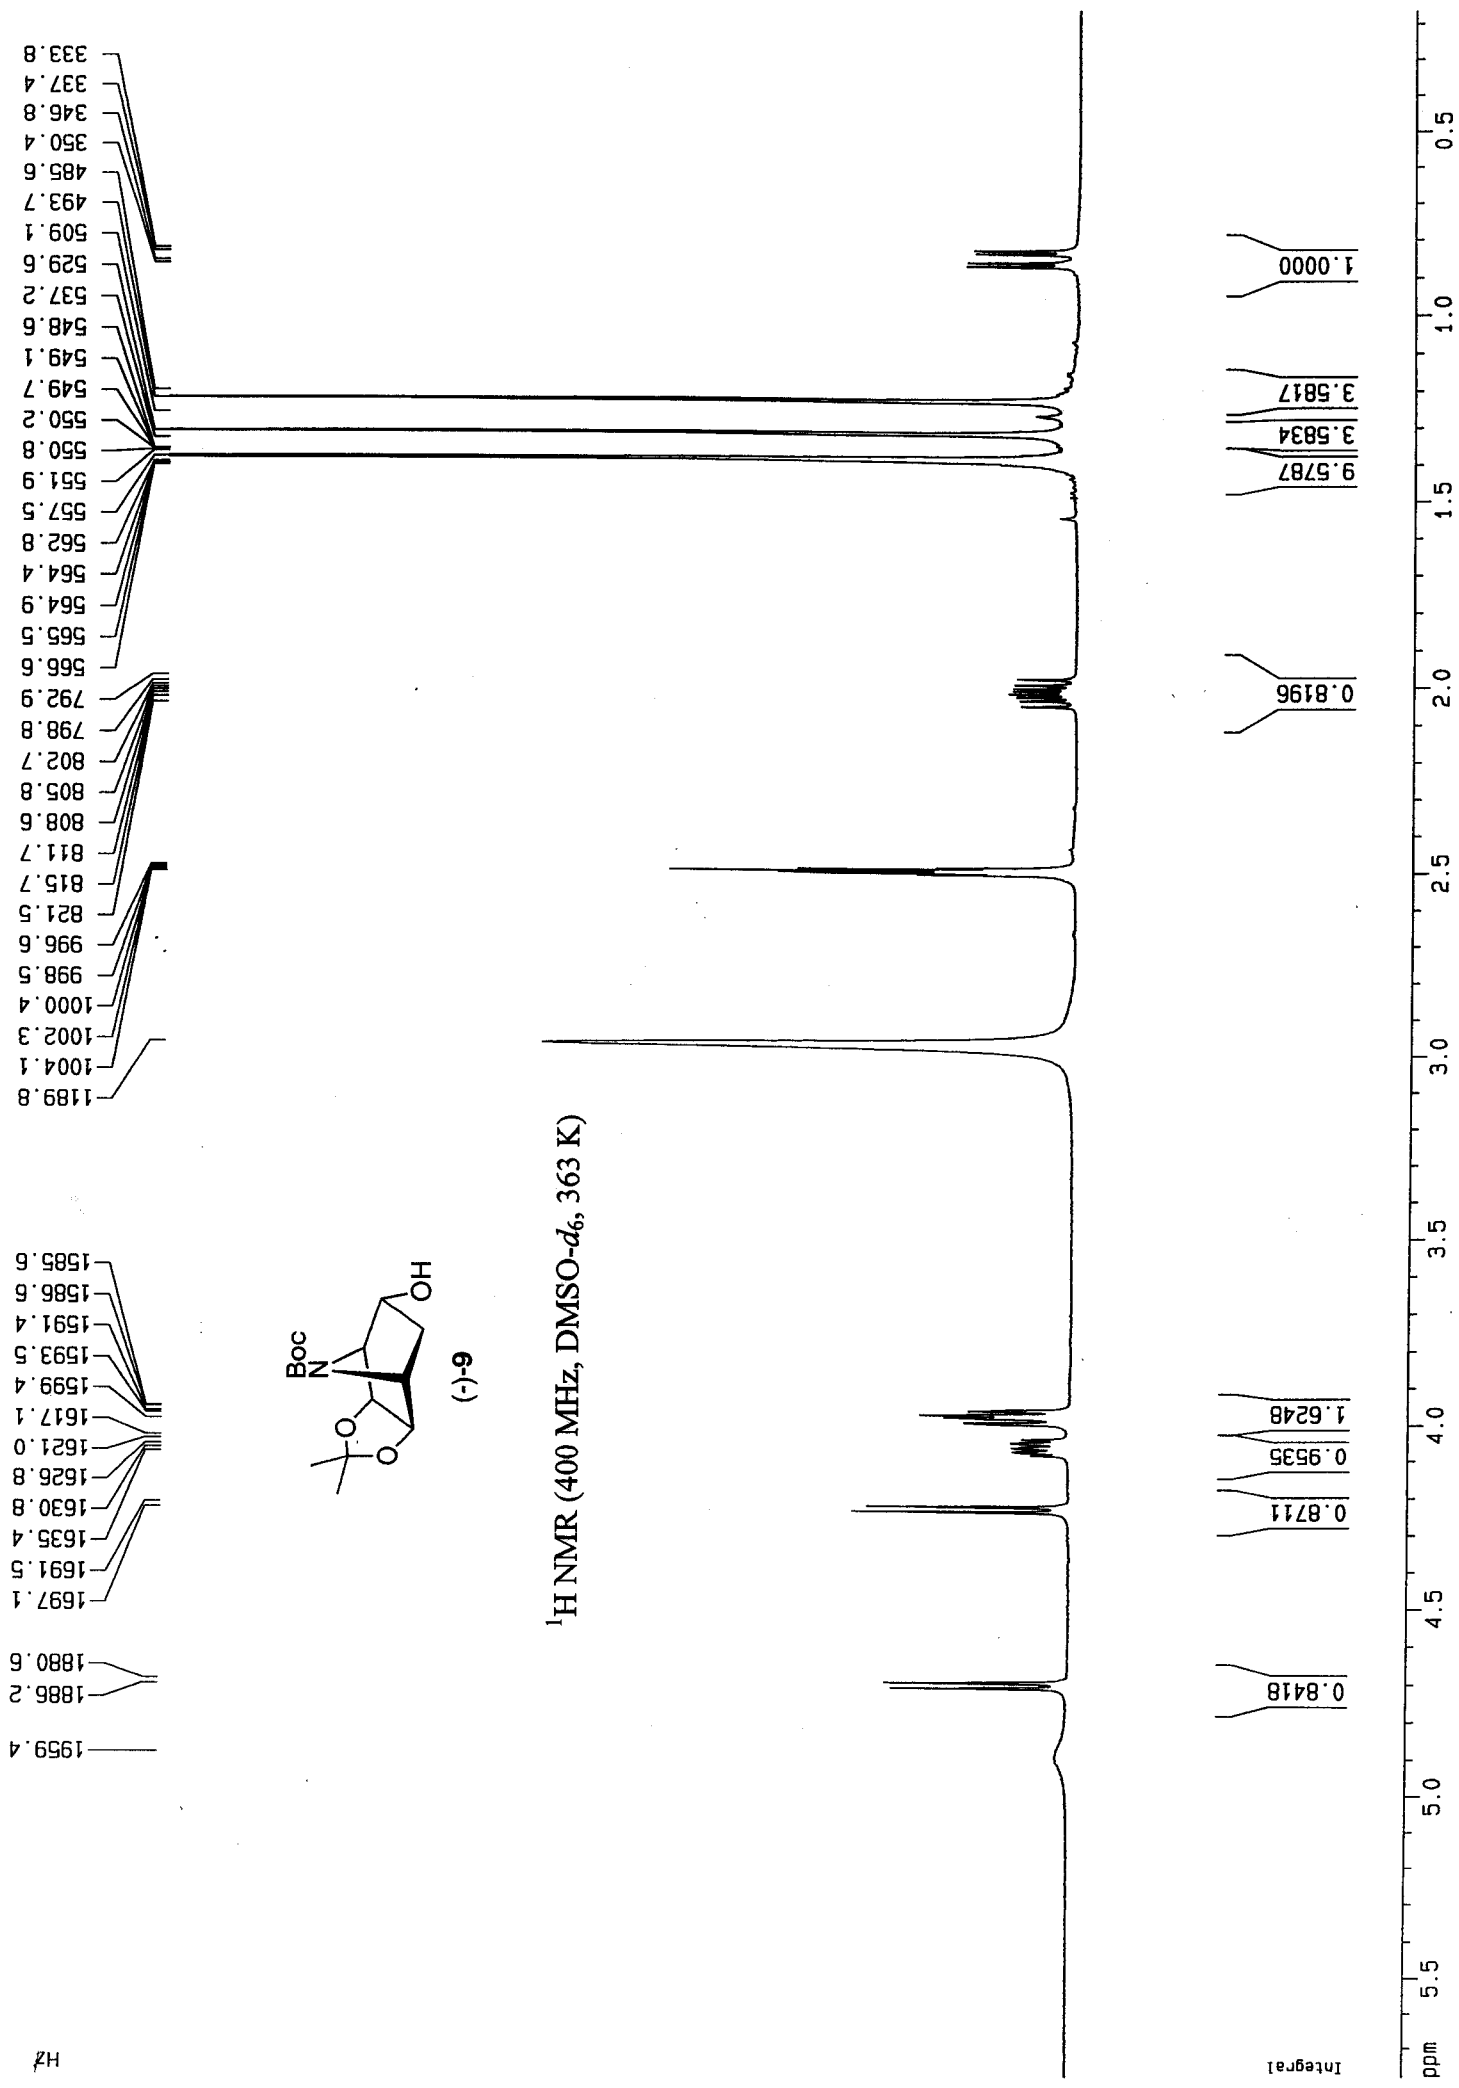

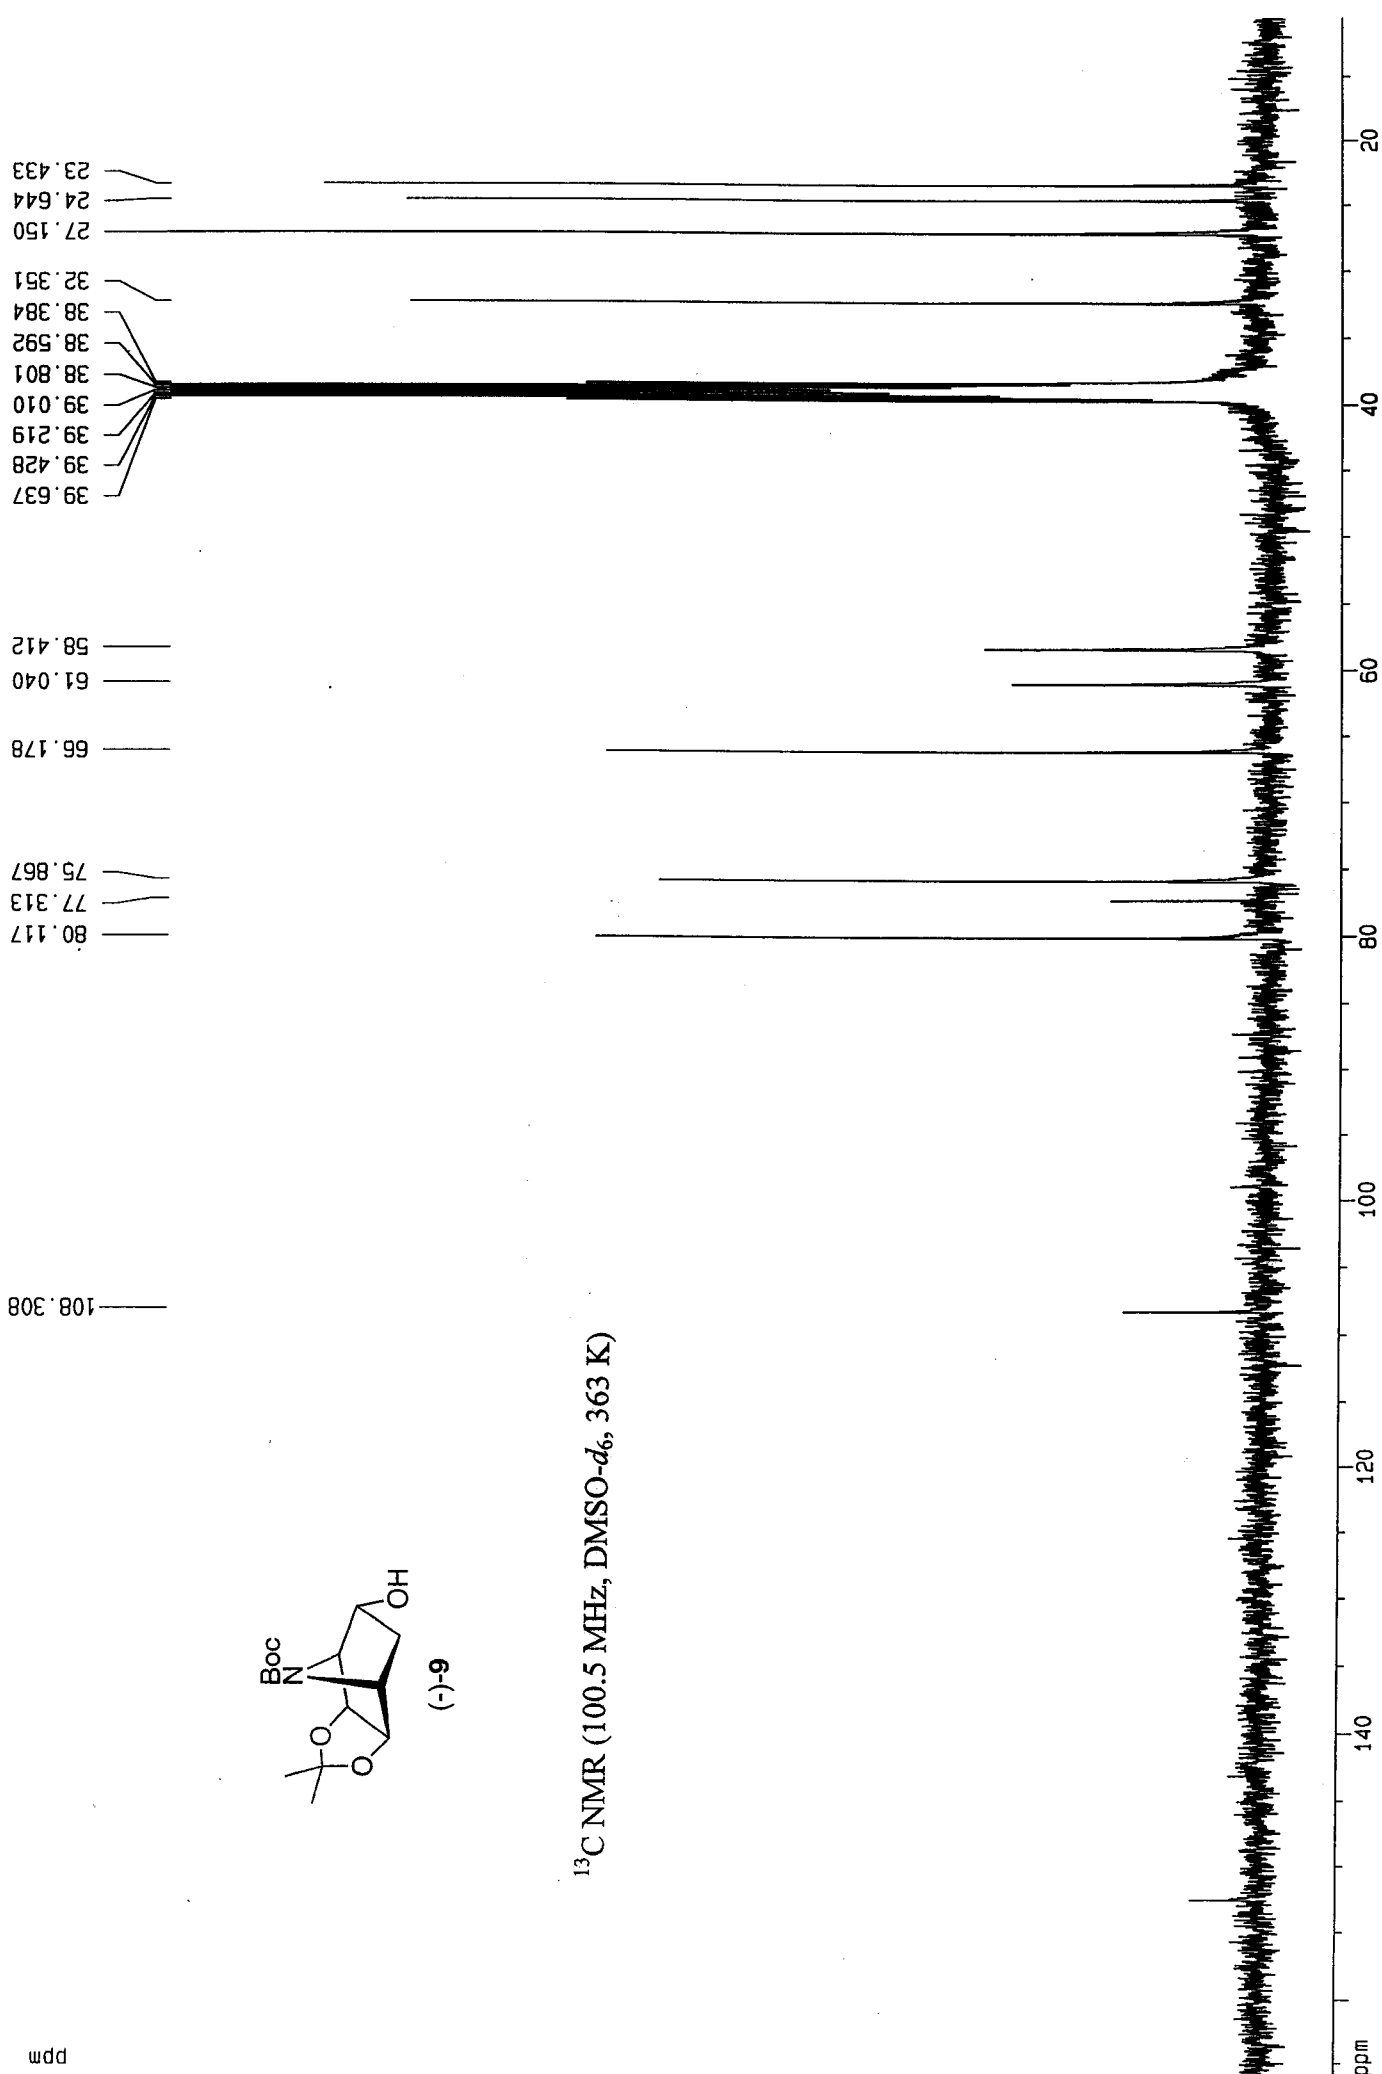

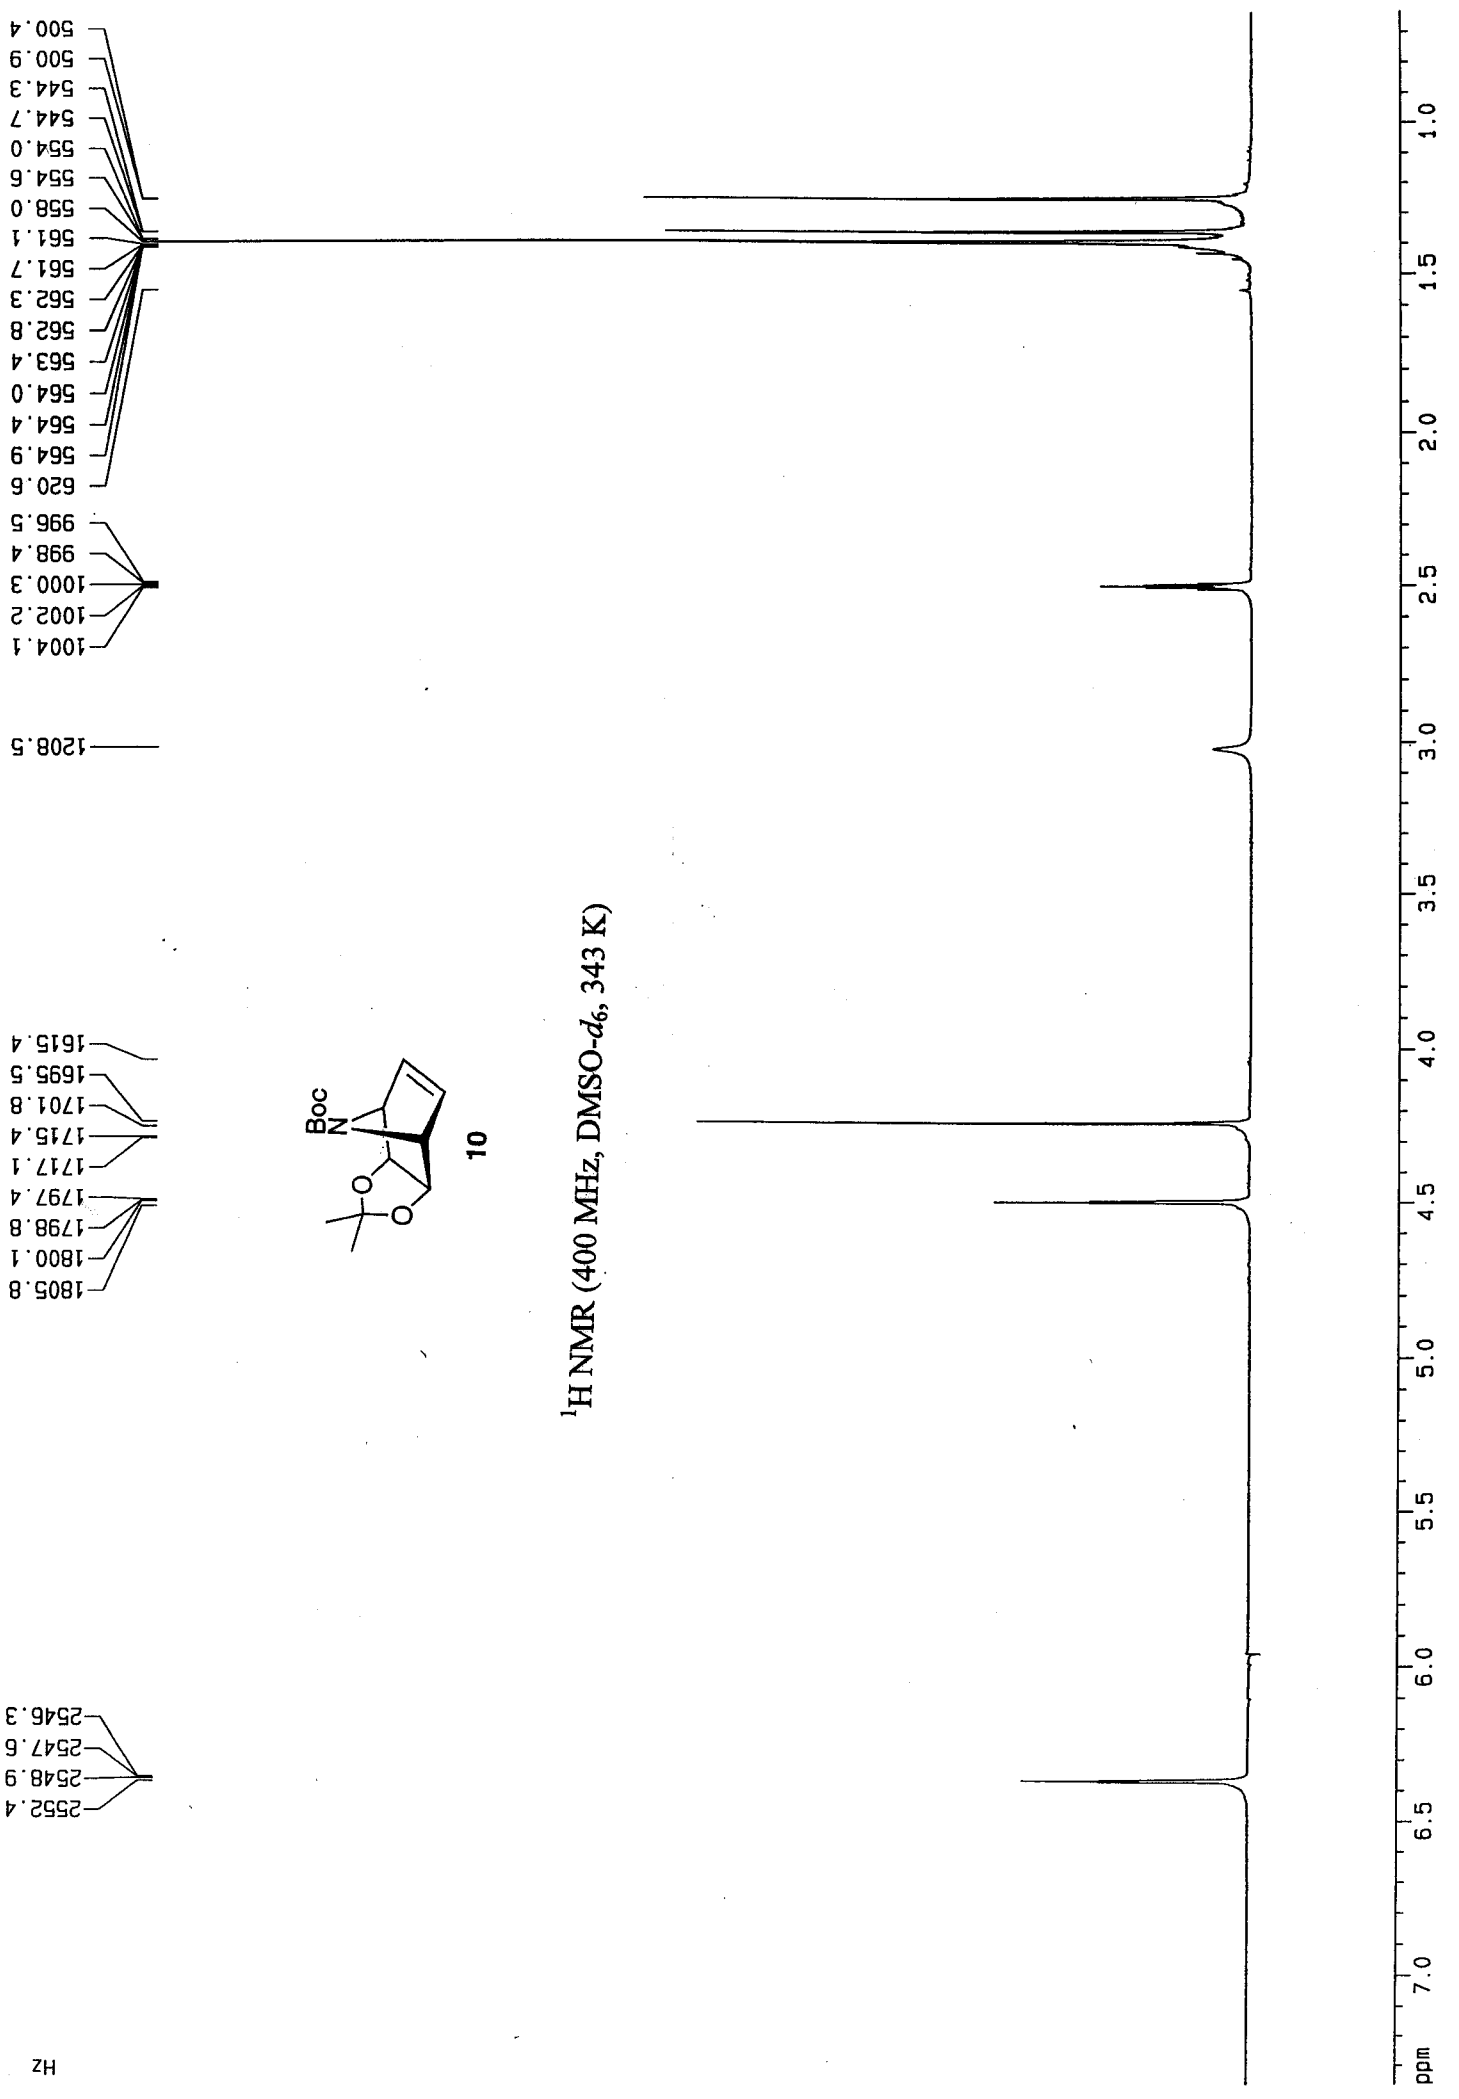



ppm

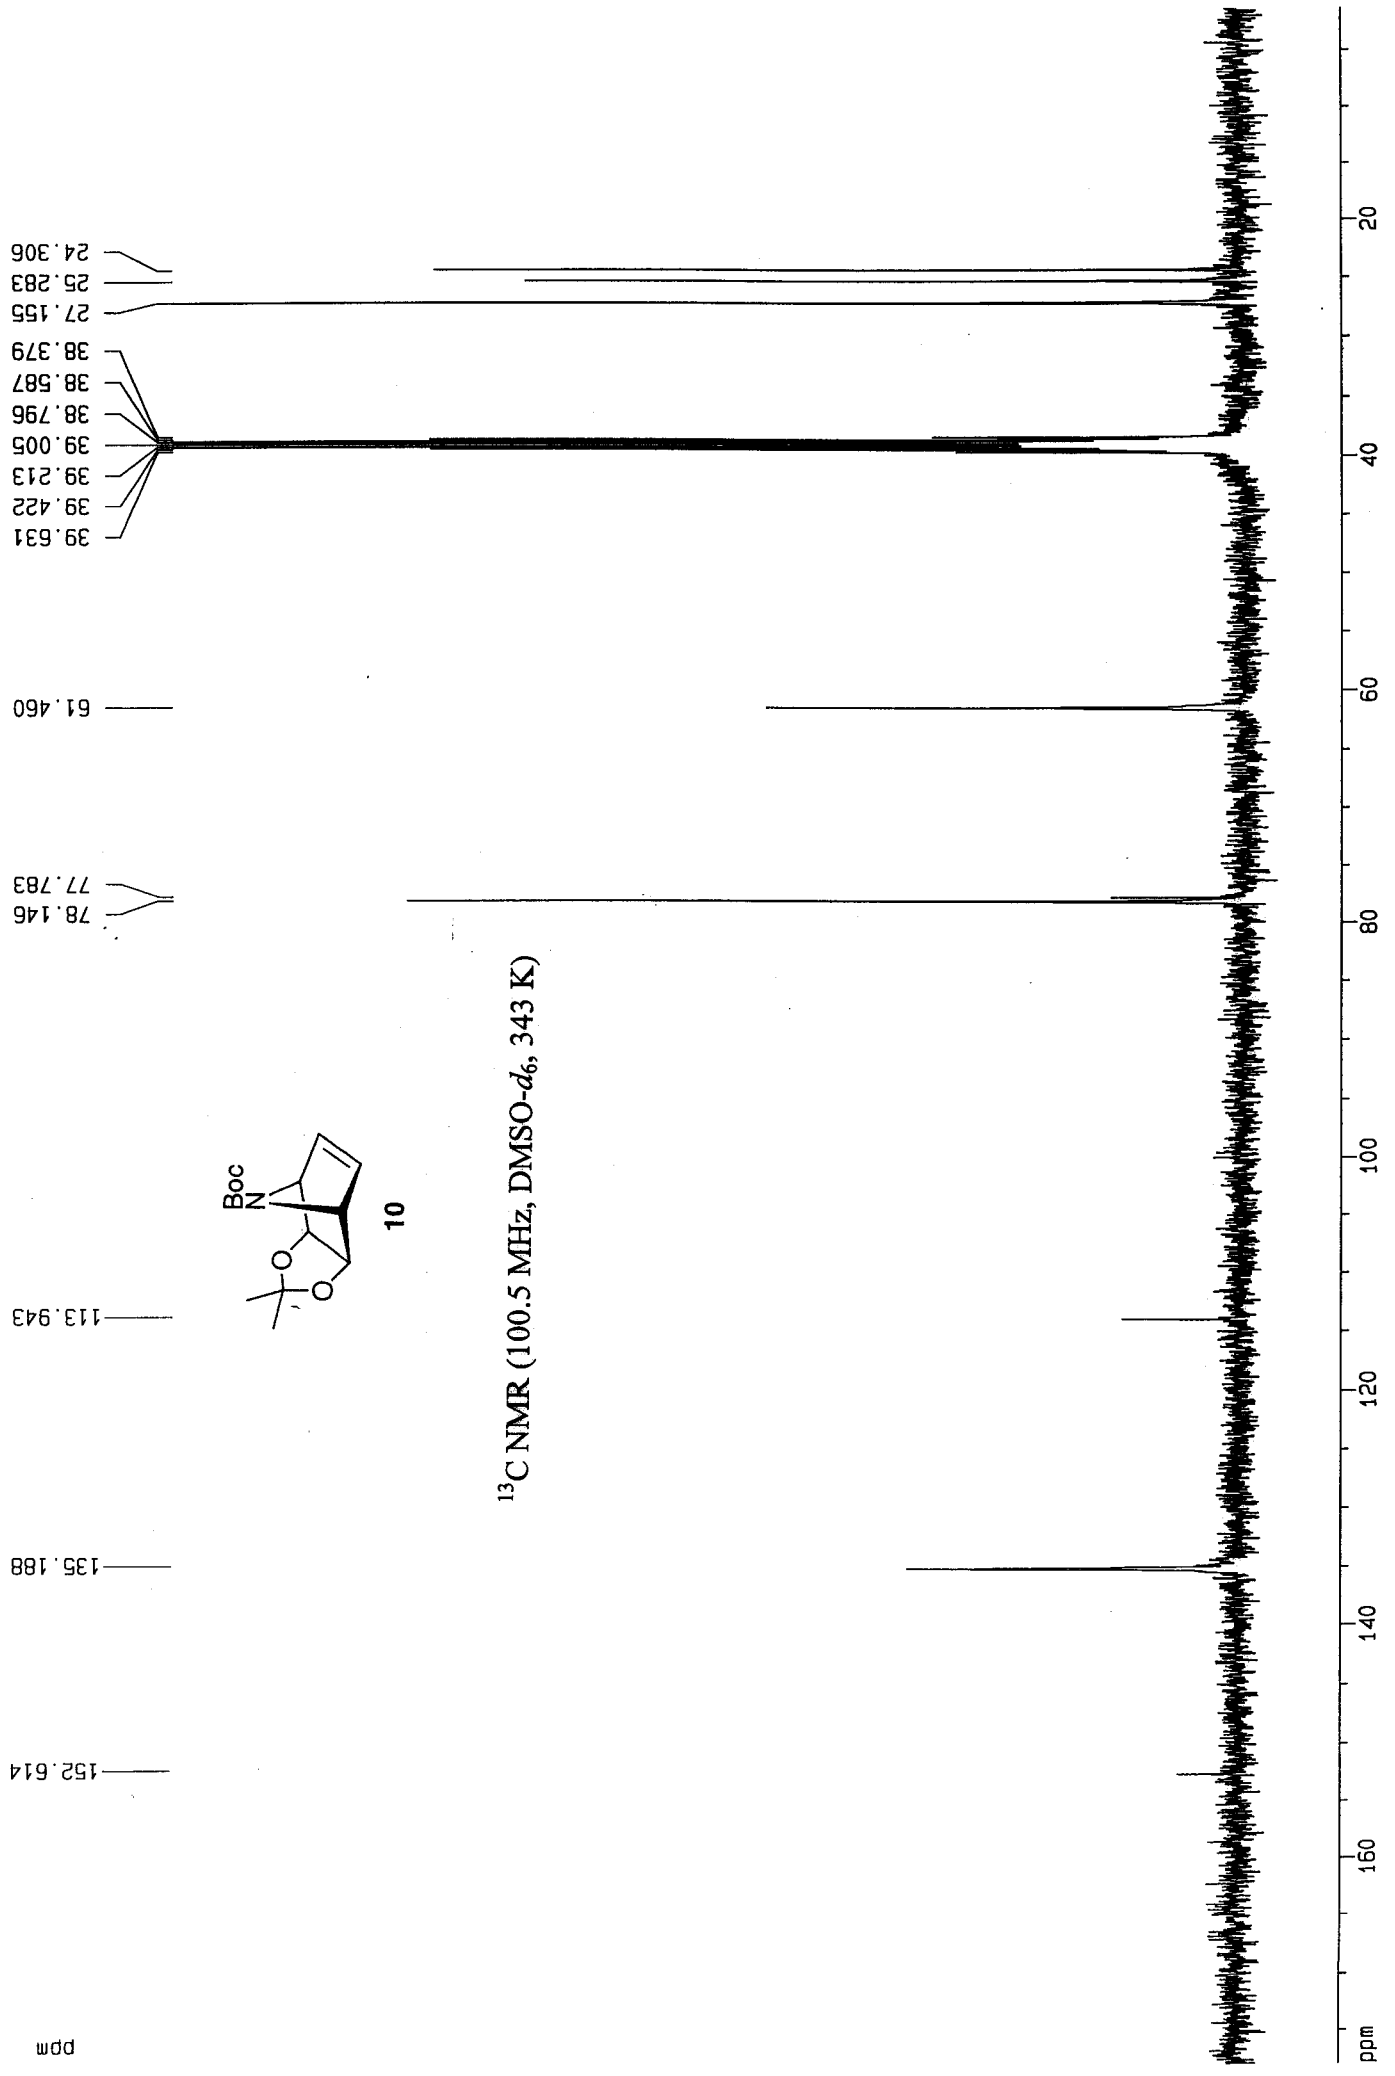

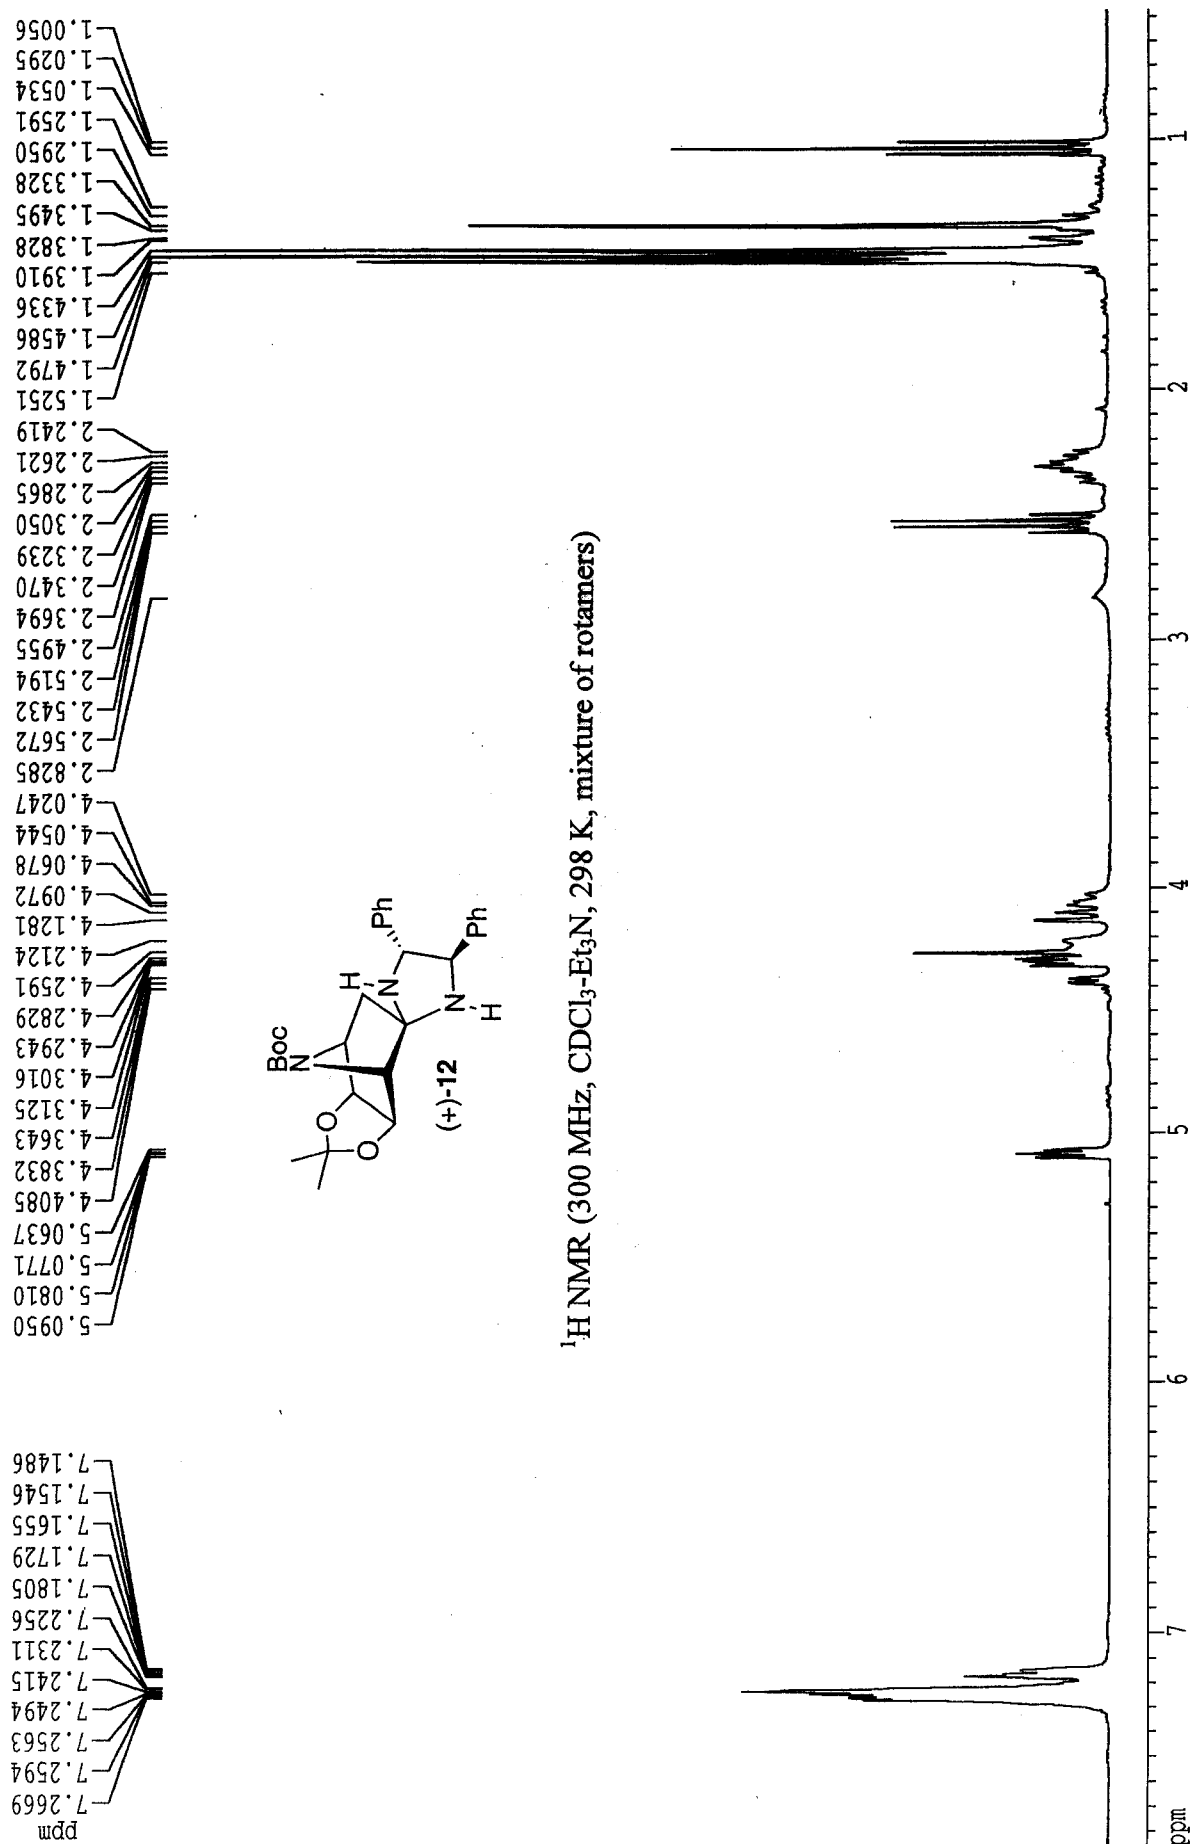

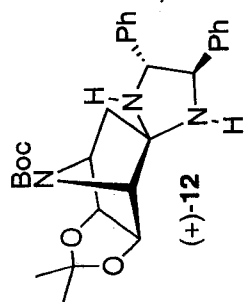

$^{13}\text{C}$  NMR (75.4 MHz,  $\text{CDCl}_3$ - $\text{Et}_3\text{N}$ , 298 K, mixture of rotamers)

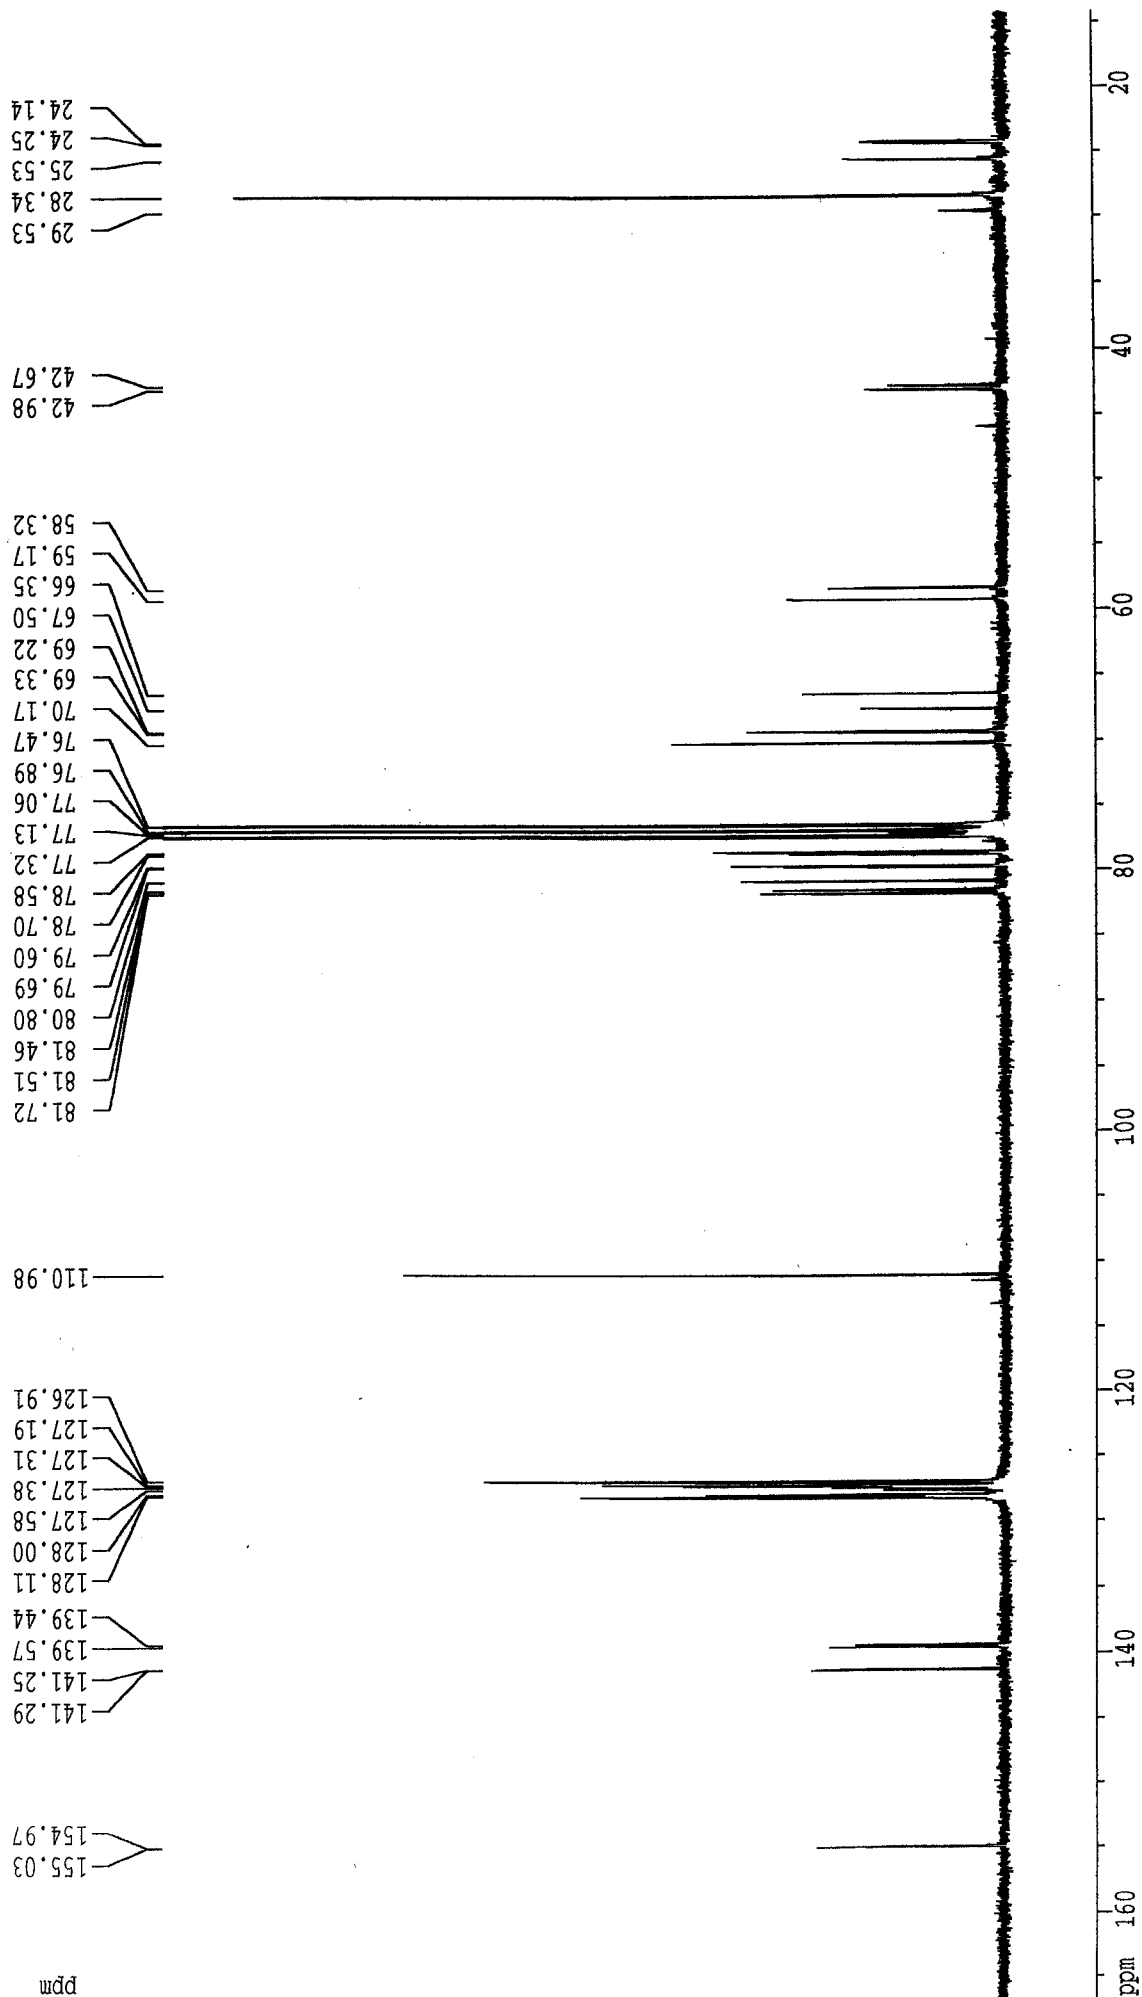

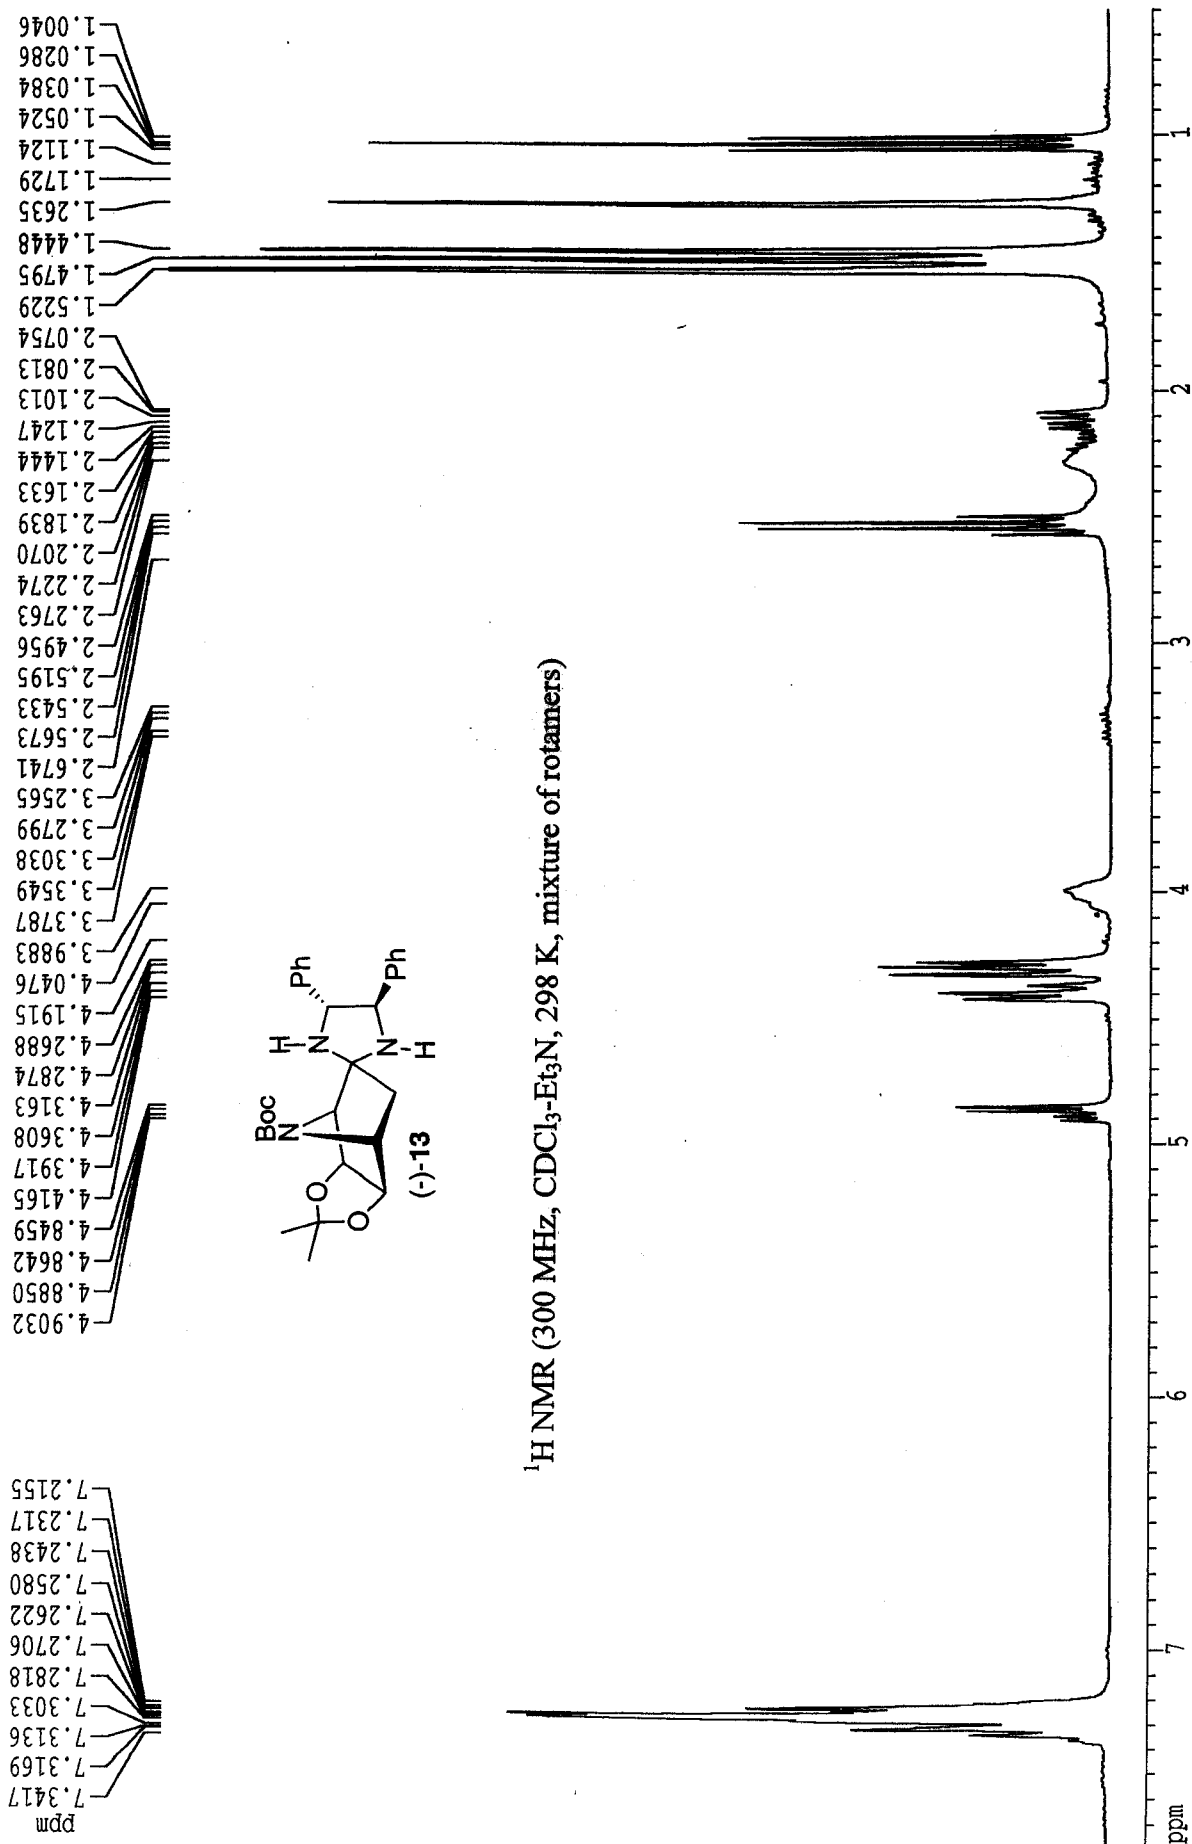

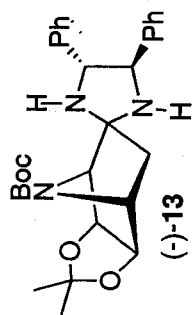

$^{13}\text{C}$  NMR (75.4 MHz,  $\text{CDCl}_3$ - $\text{Et}_3\text{N}$ , 298 K, mixture of rotamers)

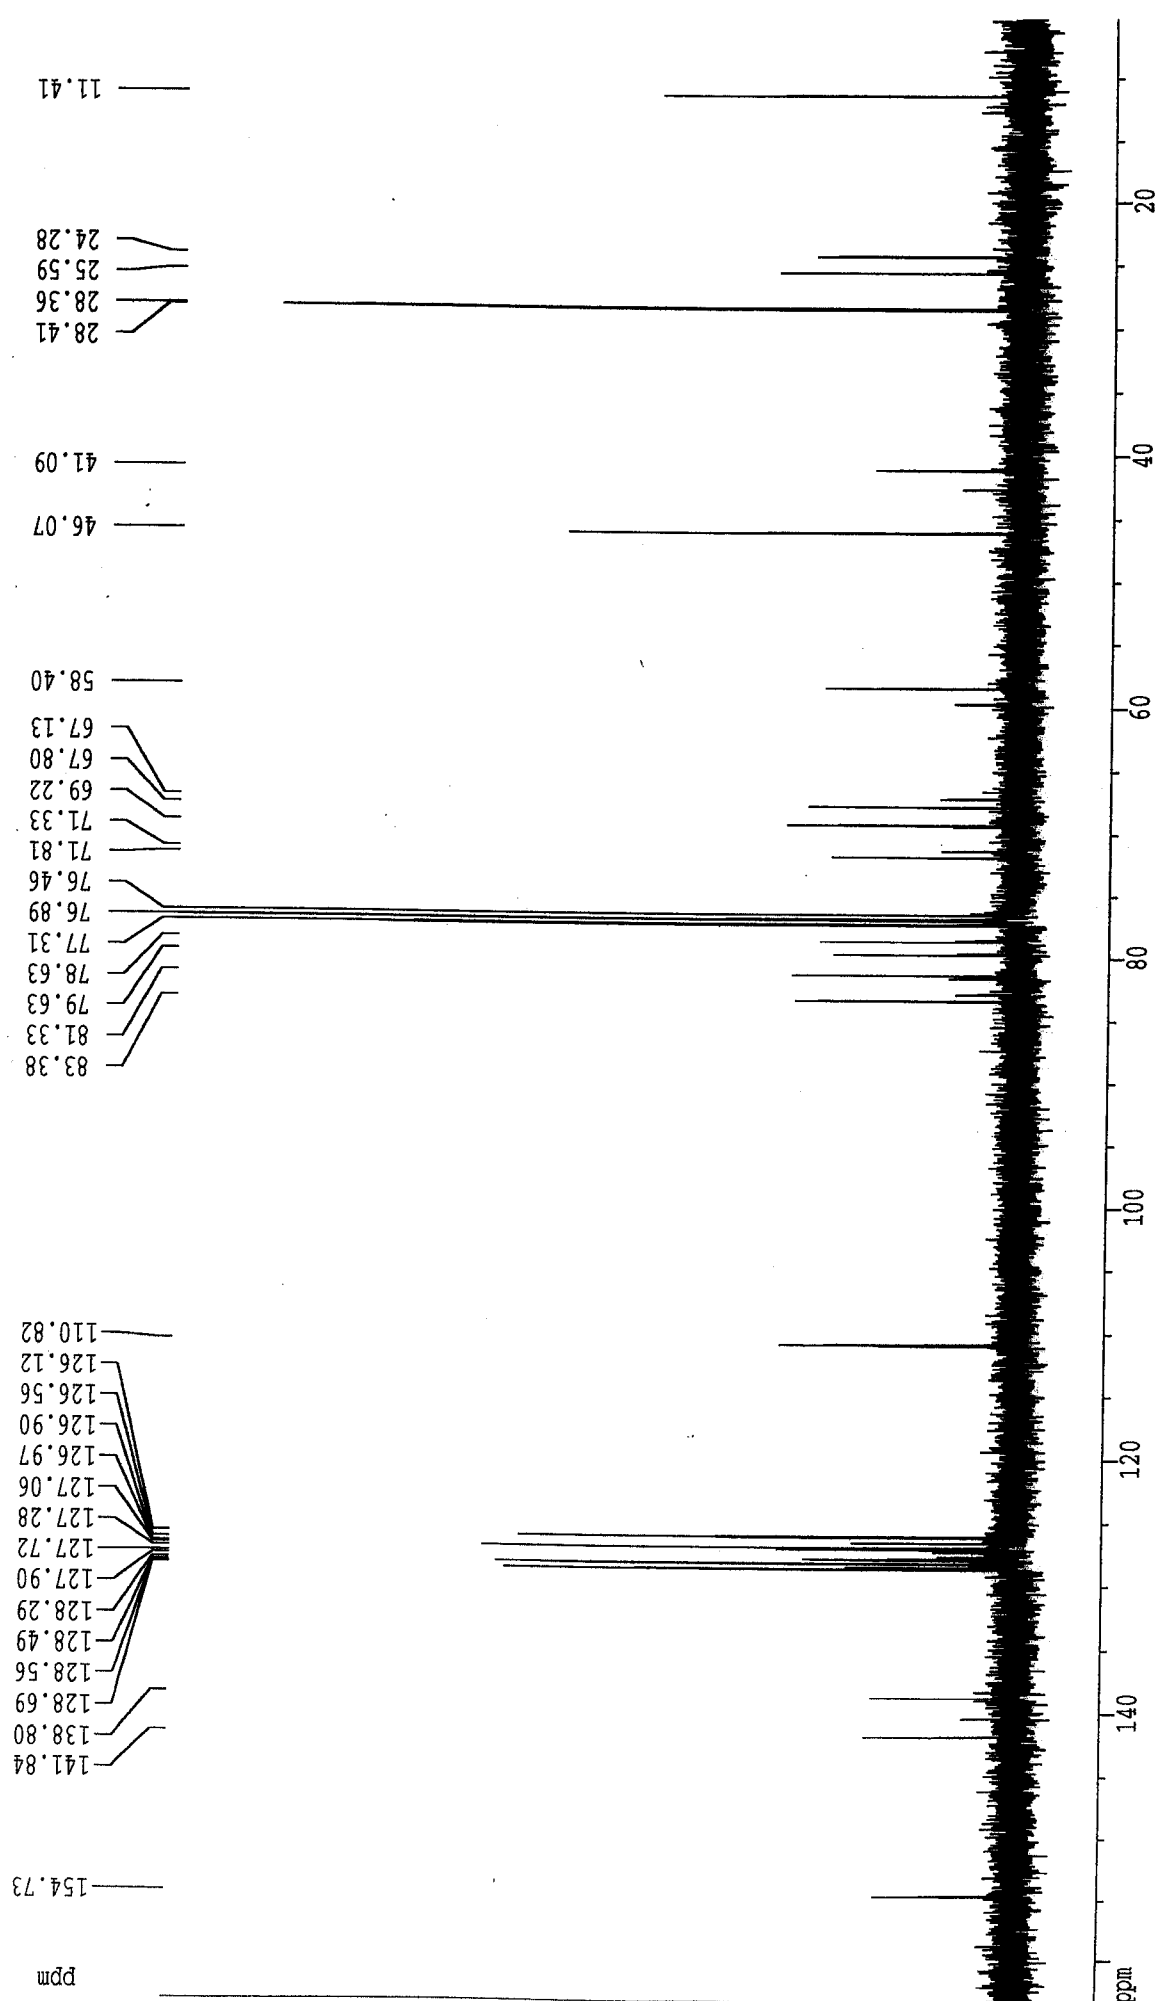



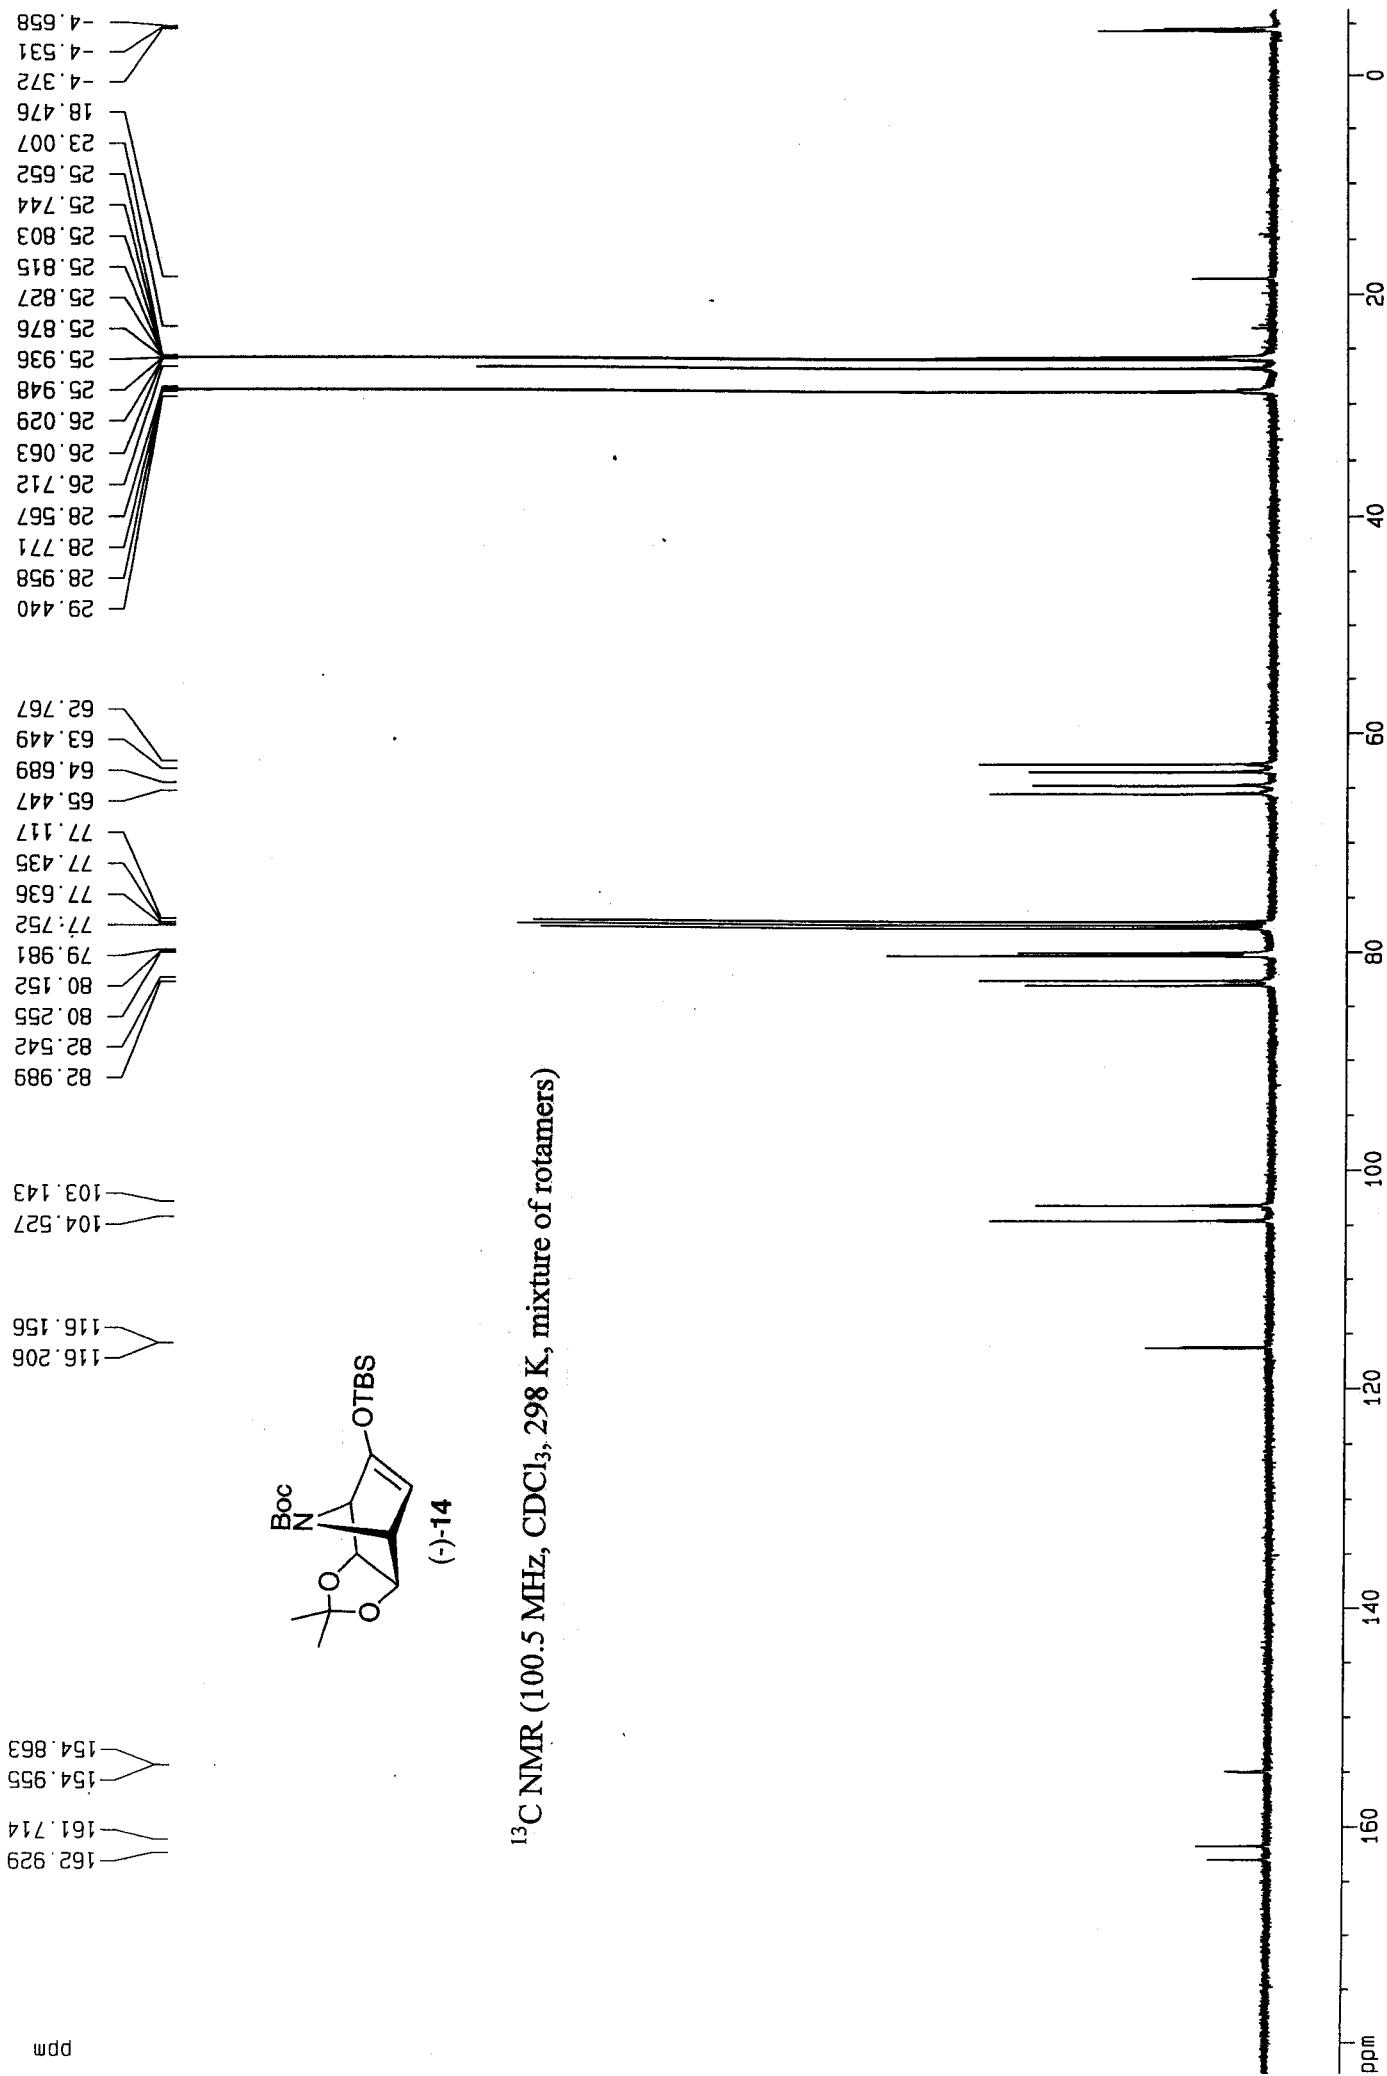





ppm

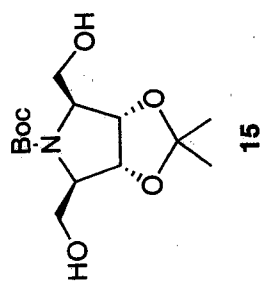

$^{13}\text{C}$  NMR (100.5 MHz, DMSO- $d_6$ , 363 K)

81.4290  
65.8542  
61.0819  
40.3250  
40.1148  
39.9056  
39.6967  
39.4879  
39.2787  
39.0698  
27.7923  
26.8248  
24.9656

ppm

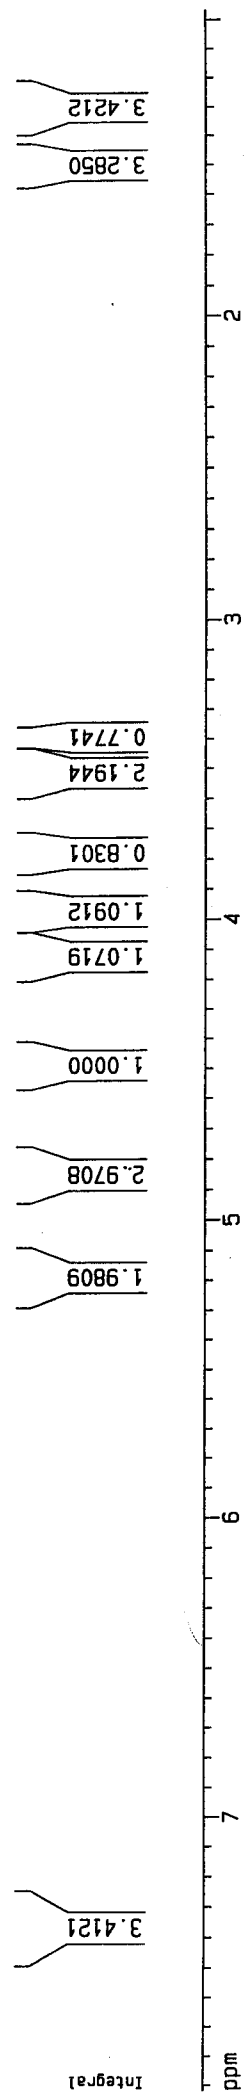

<sup>1</sup>H NMR (400 MHz, CD<sub>3</sub>OD, 298 K)

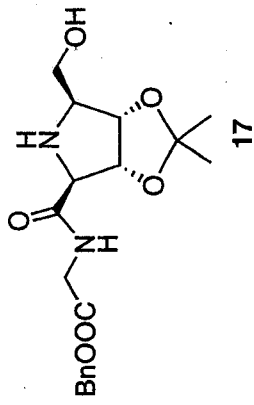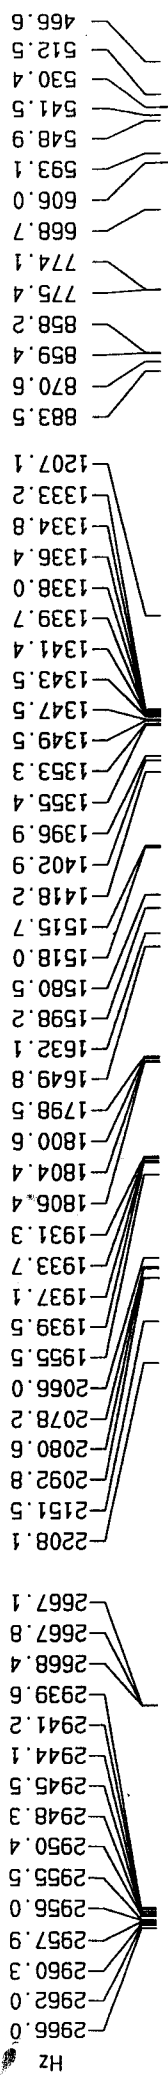

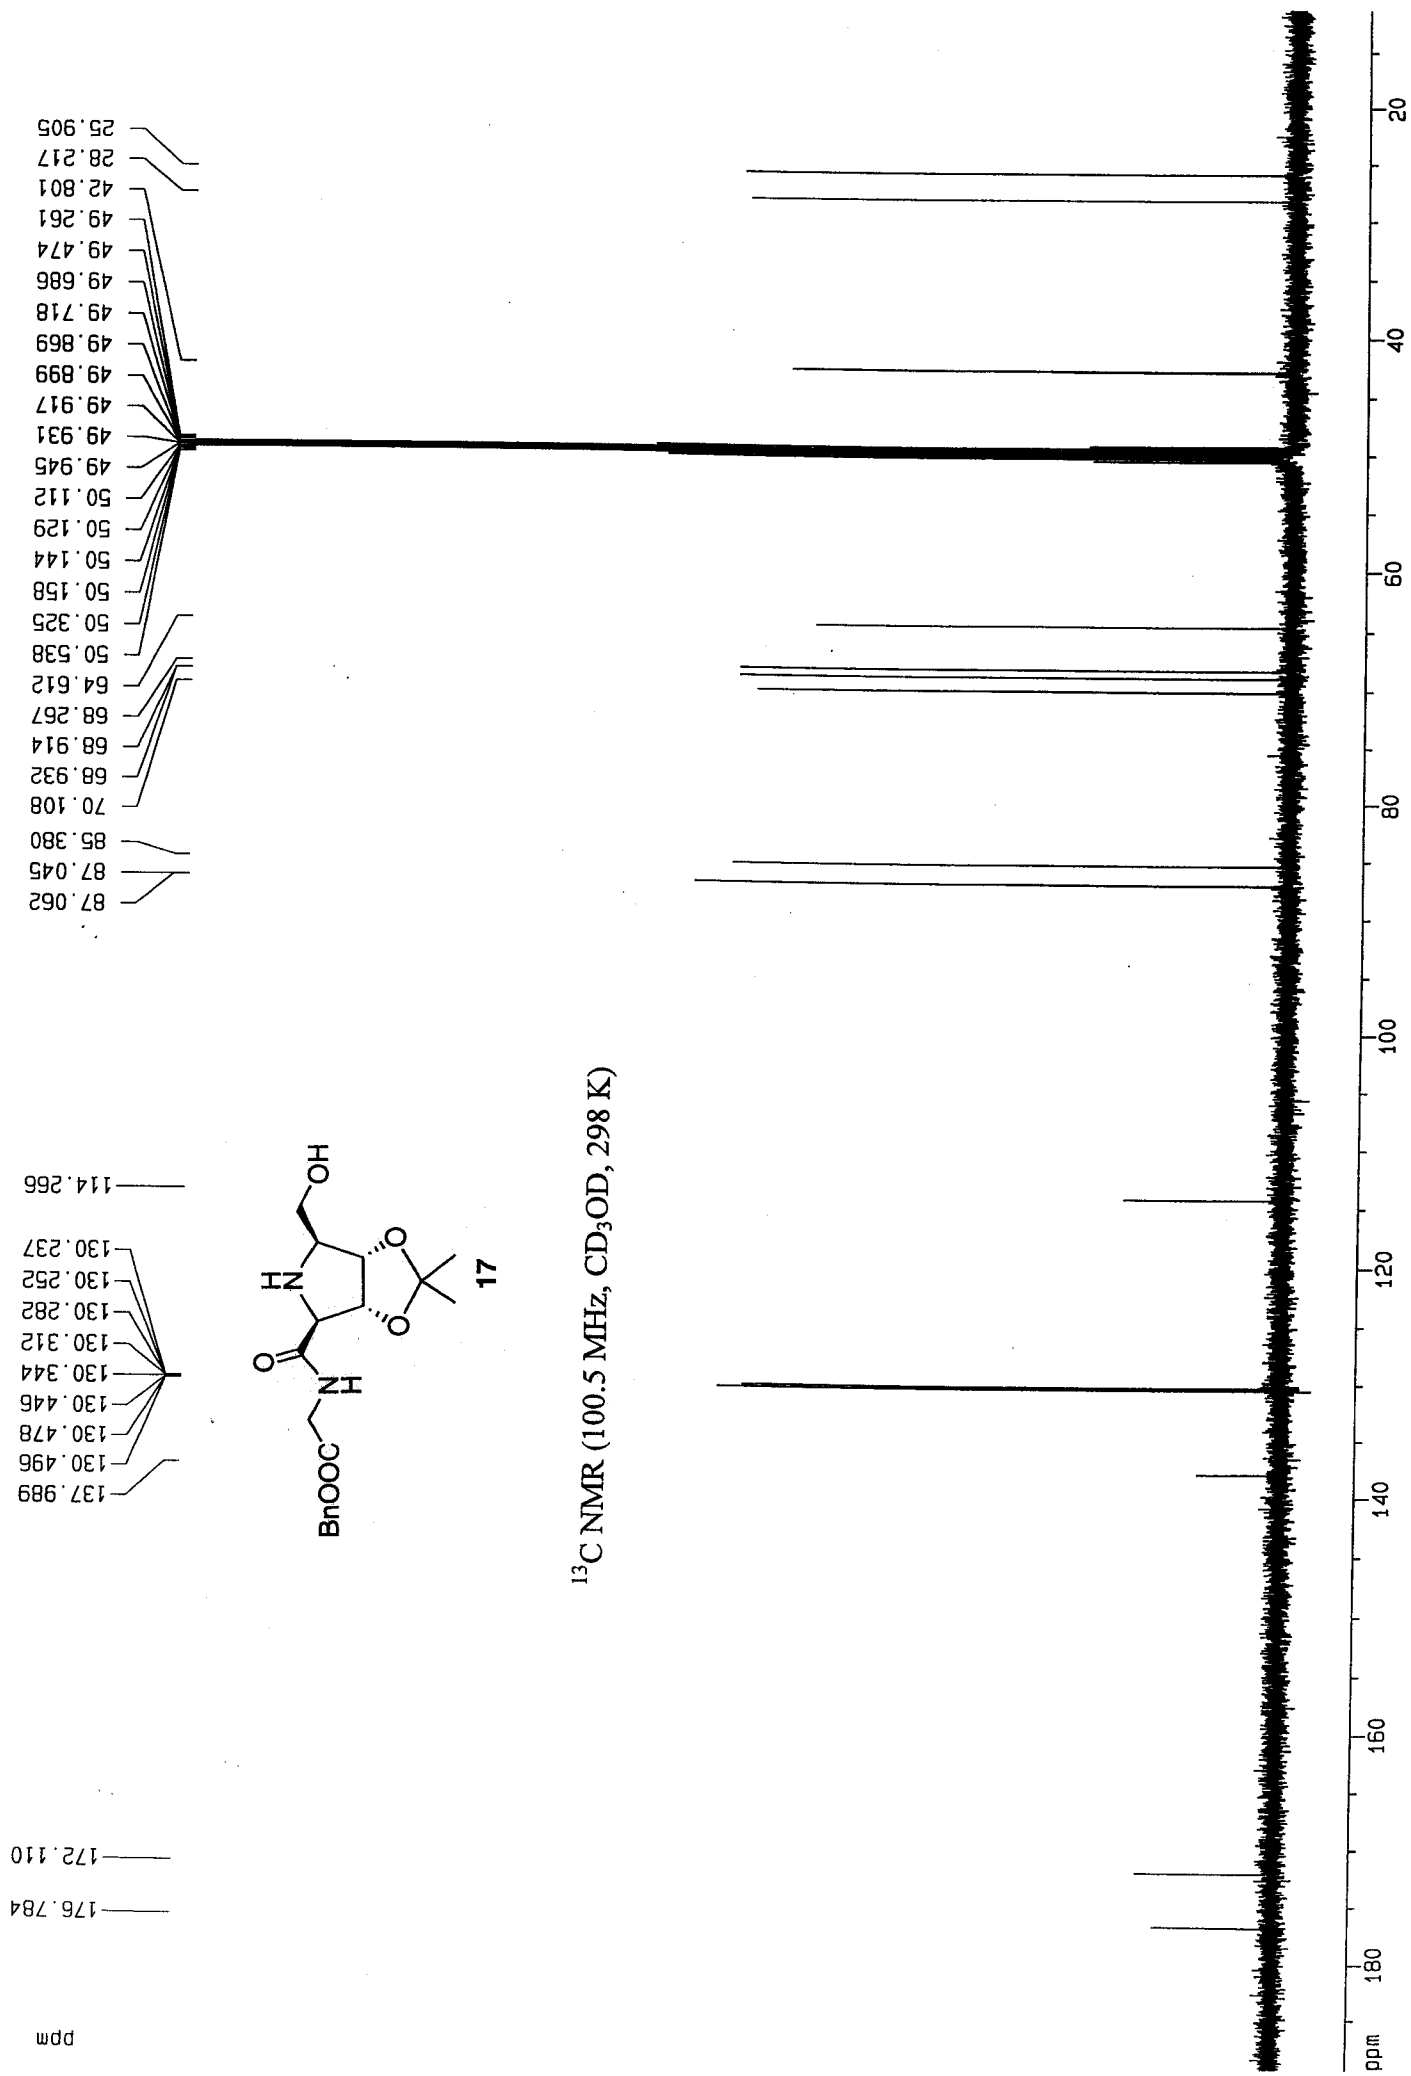

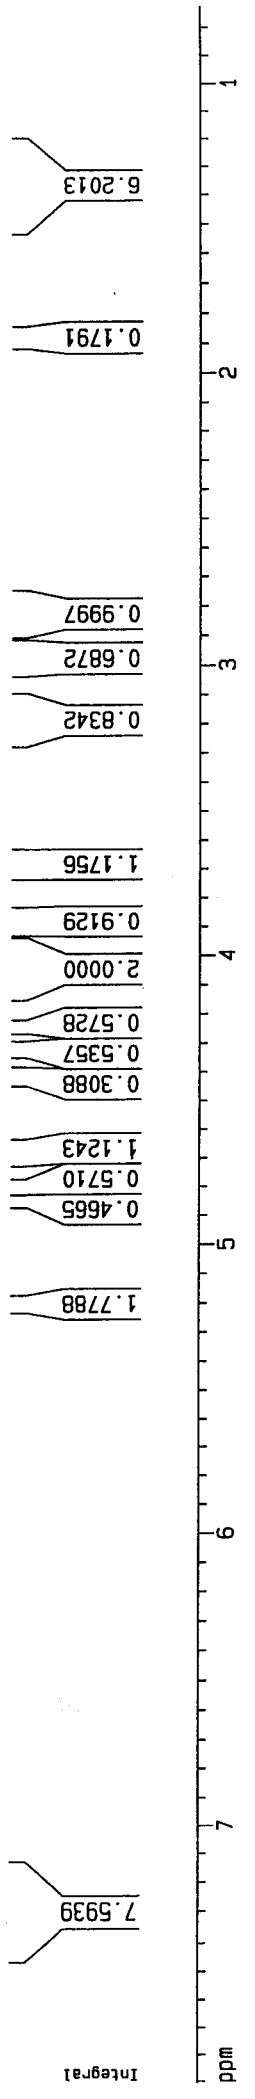

<sup>1</sup>H NMR (400 MHz, CD<sub>3</sub>OD, 298 K, mixture of conformers)

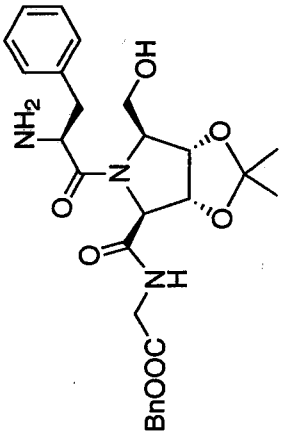

19

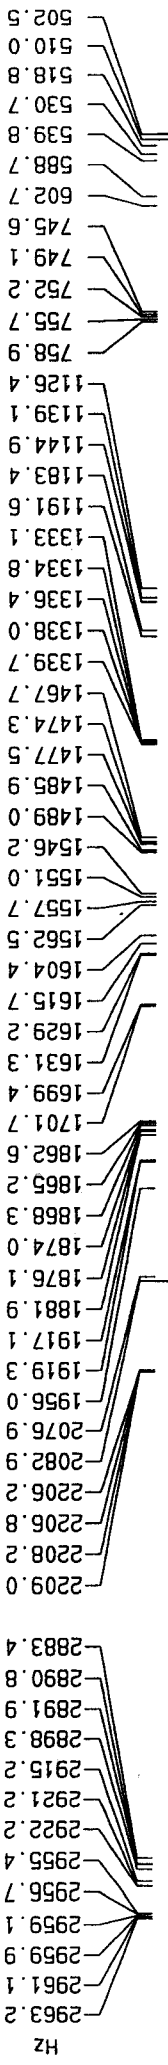

ppm

177.590  
177.312  
174.551  
174.307  
171.756  
171.636

139.681  
138.987  
137.970  
131.566  
131.342  
131.283  
131.265  
130.668  
130.652  
130.583  
130.526  
130.510  
130.349  
130.332  
130.314  
130.300  
128.927  
128.748  
114.237  
114.152

85.805  
85.788  
84.898  
83.766  
83.379  
83.348  
70.949  
69.028  
68.941  
68.286  
62.335  
56.275  
55.853  
50.539  
50.326  
50.131  
50.114  
50.097  
49.932  
49.918  
49.901  
49.884  
49.870  
49.705  
49.688  
49.671  
49.475  
49.262  
43.125  
42.556  
28.528  
28.510  
28.355  
26.239  
26.011

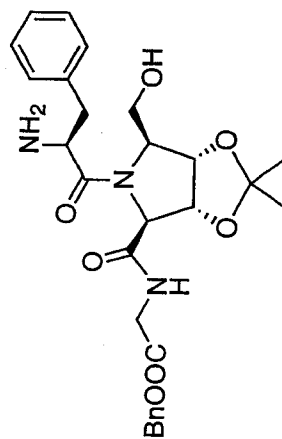

19

$^{13}\text{C}$  NMR (100.5 MHz,  $\text{CD}_3\text{OD}$ , 298 K, mixture of conformers)

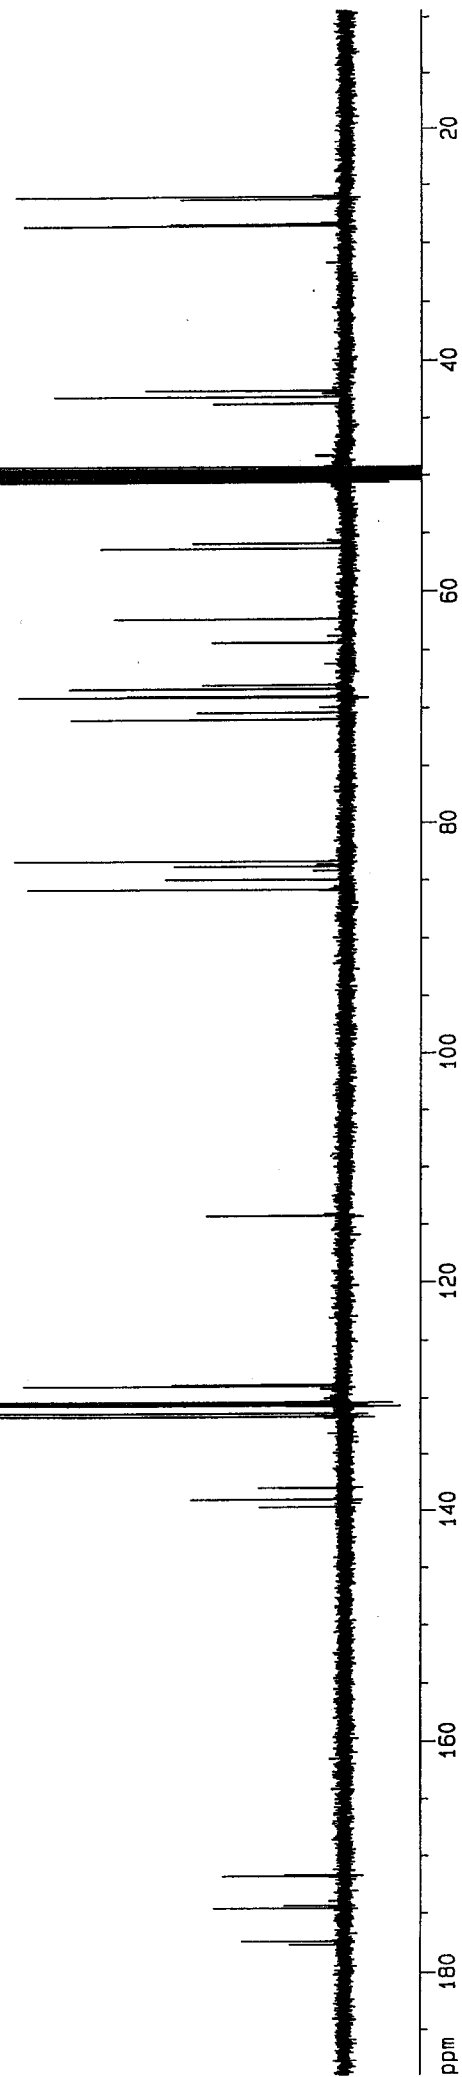

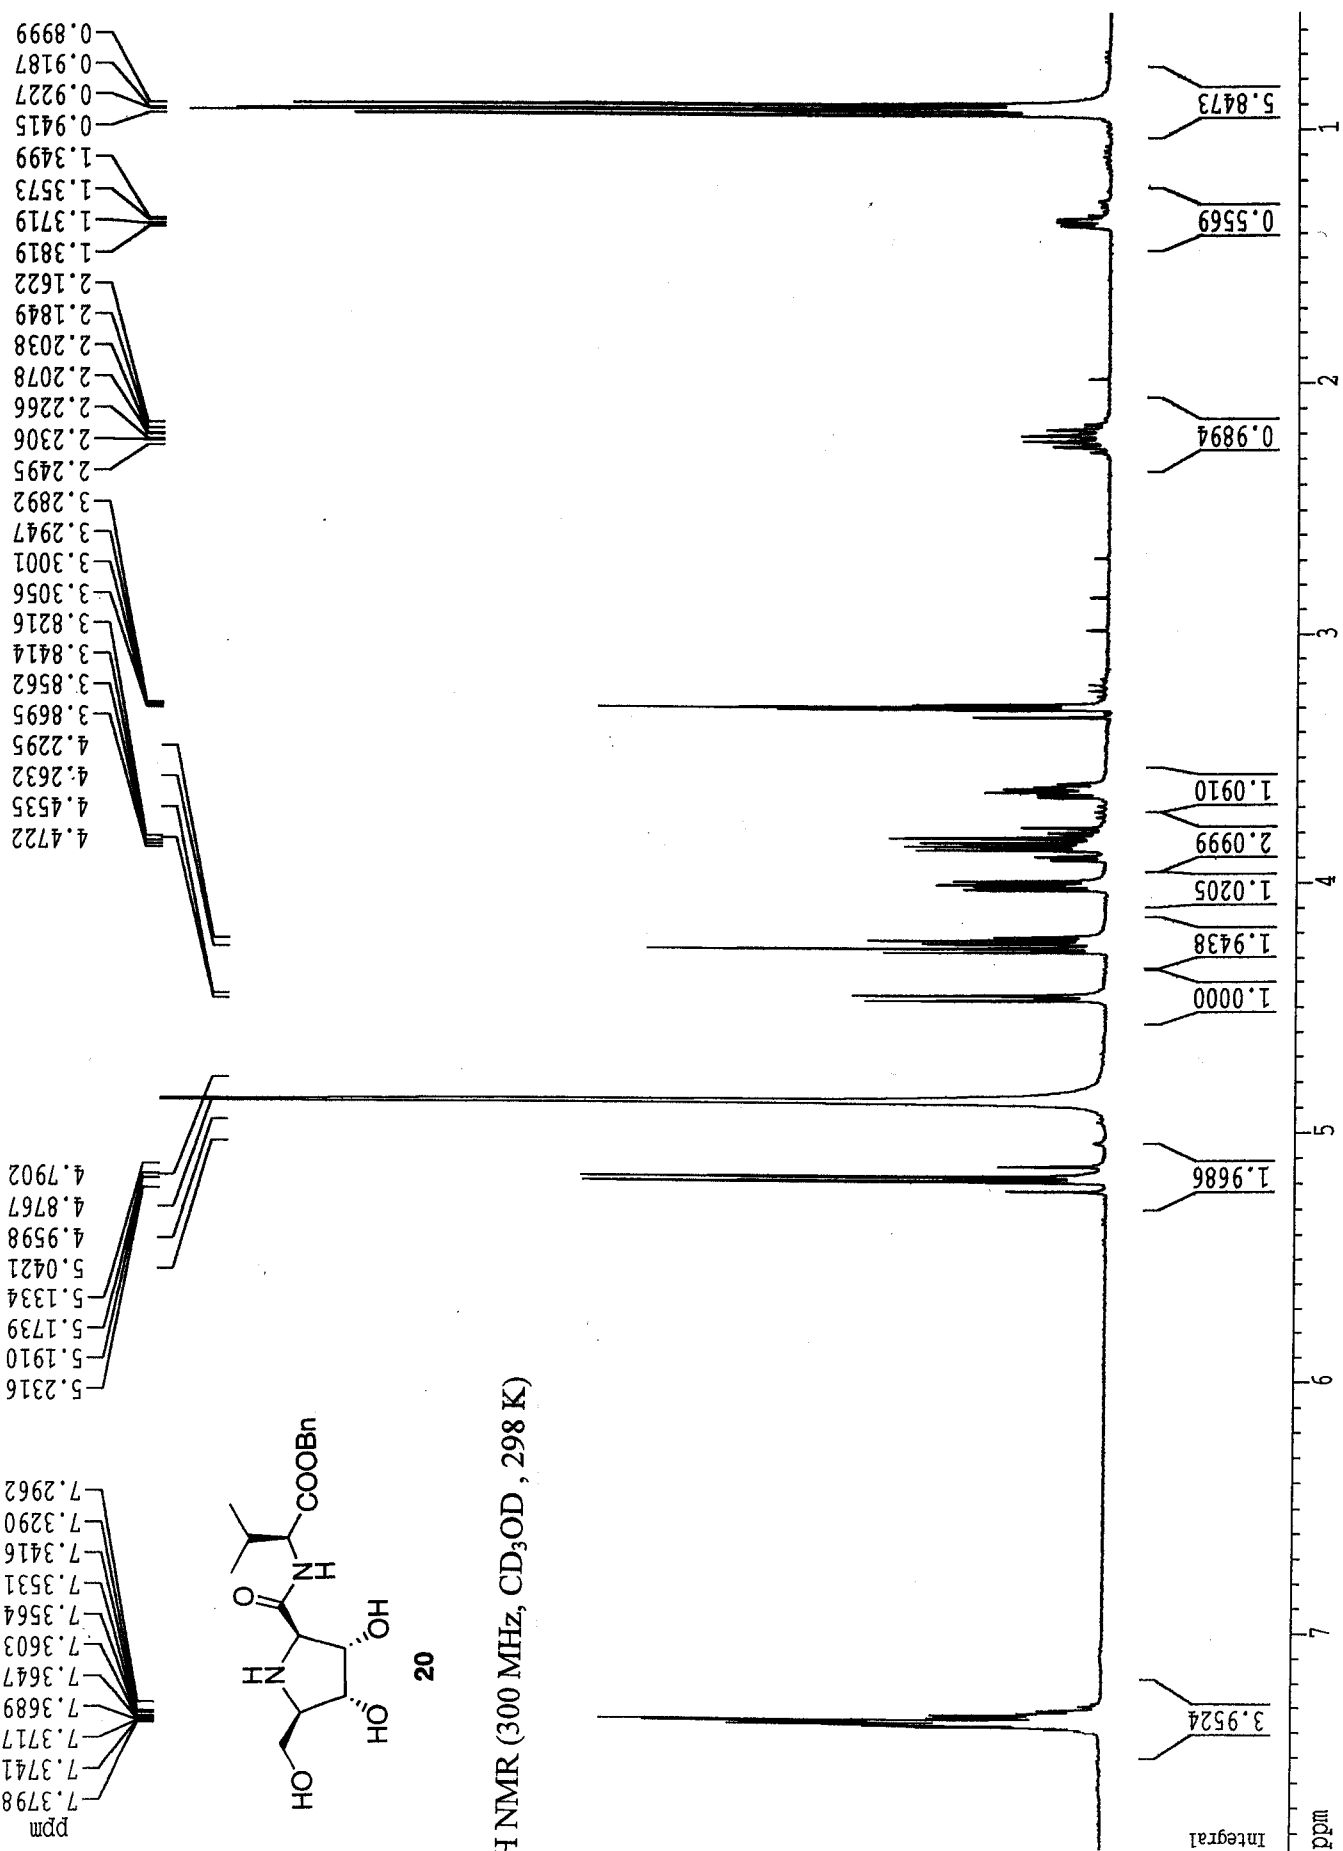

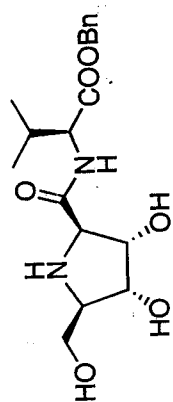

20

$^{13}\text{C}$  NMR (75.4 MHz,  $\text{CD}_3\text{OD}$ , 298 K)

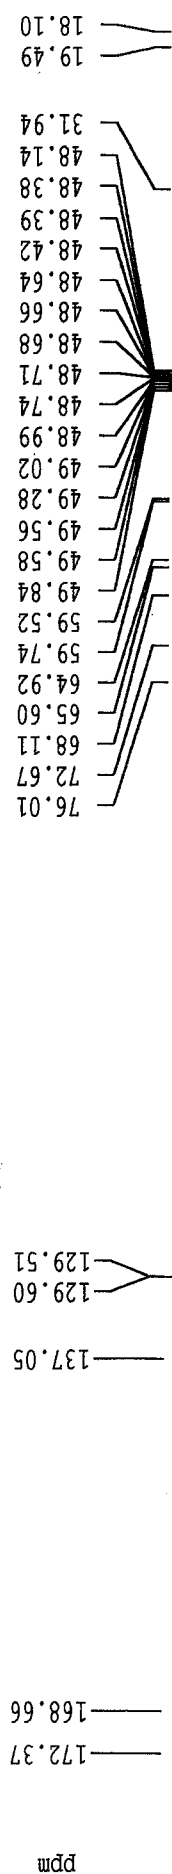





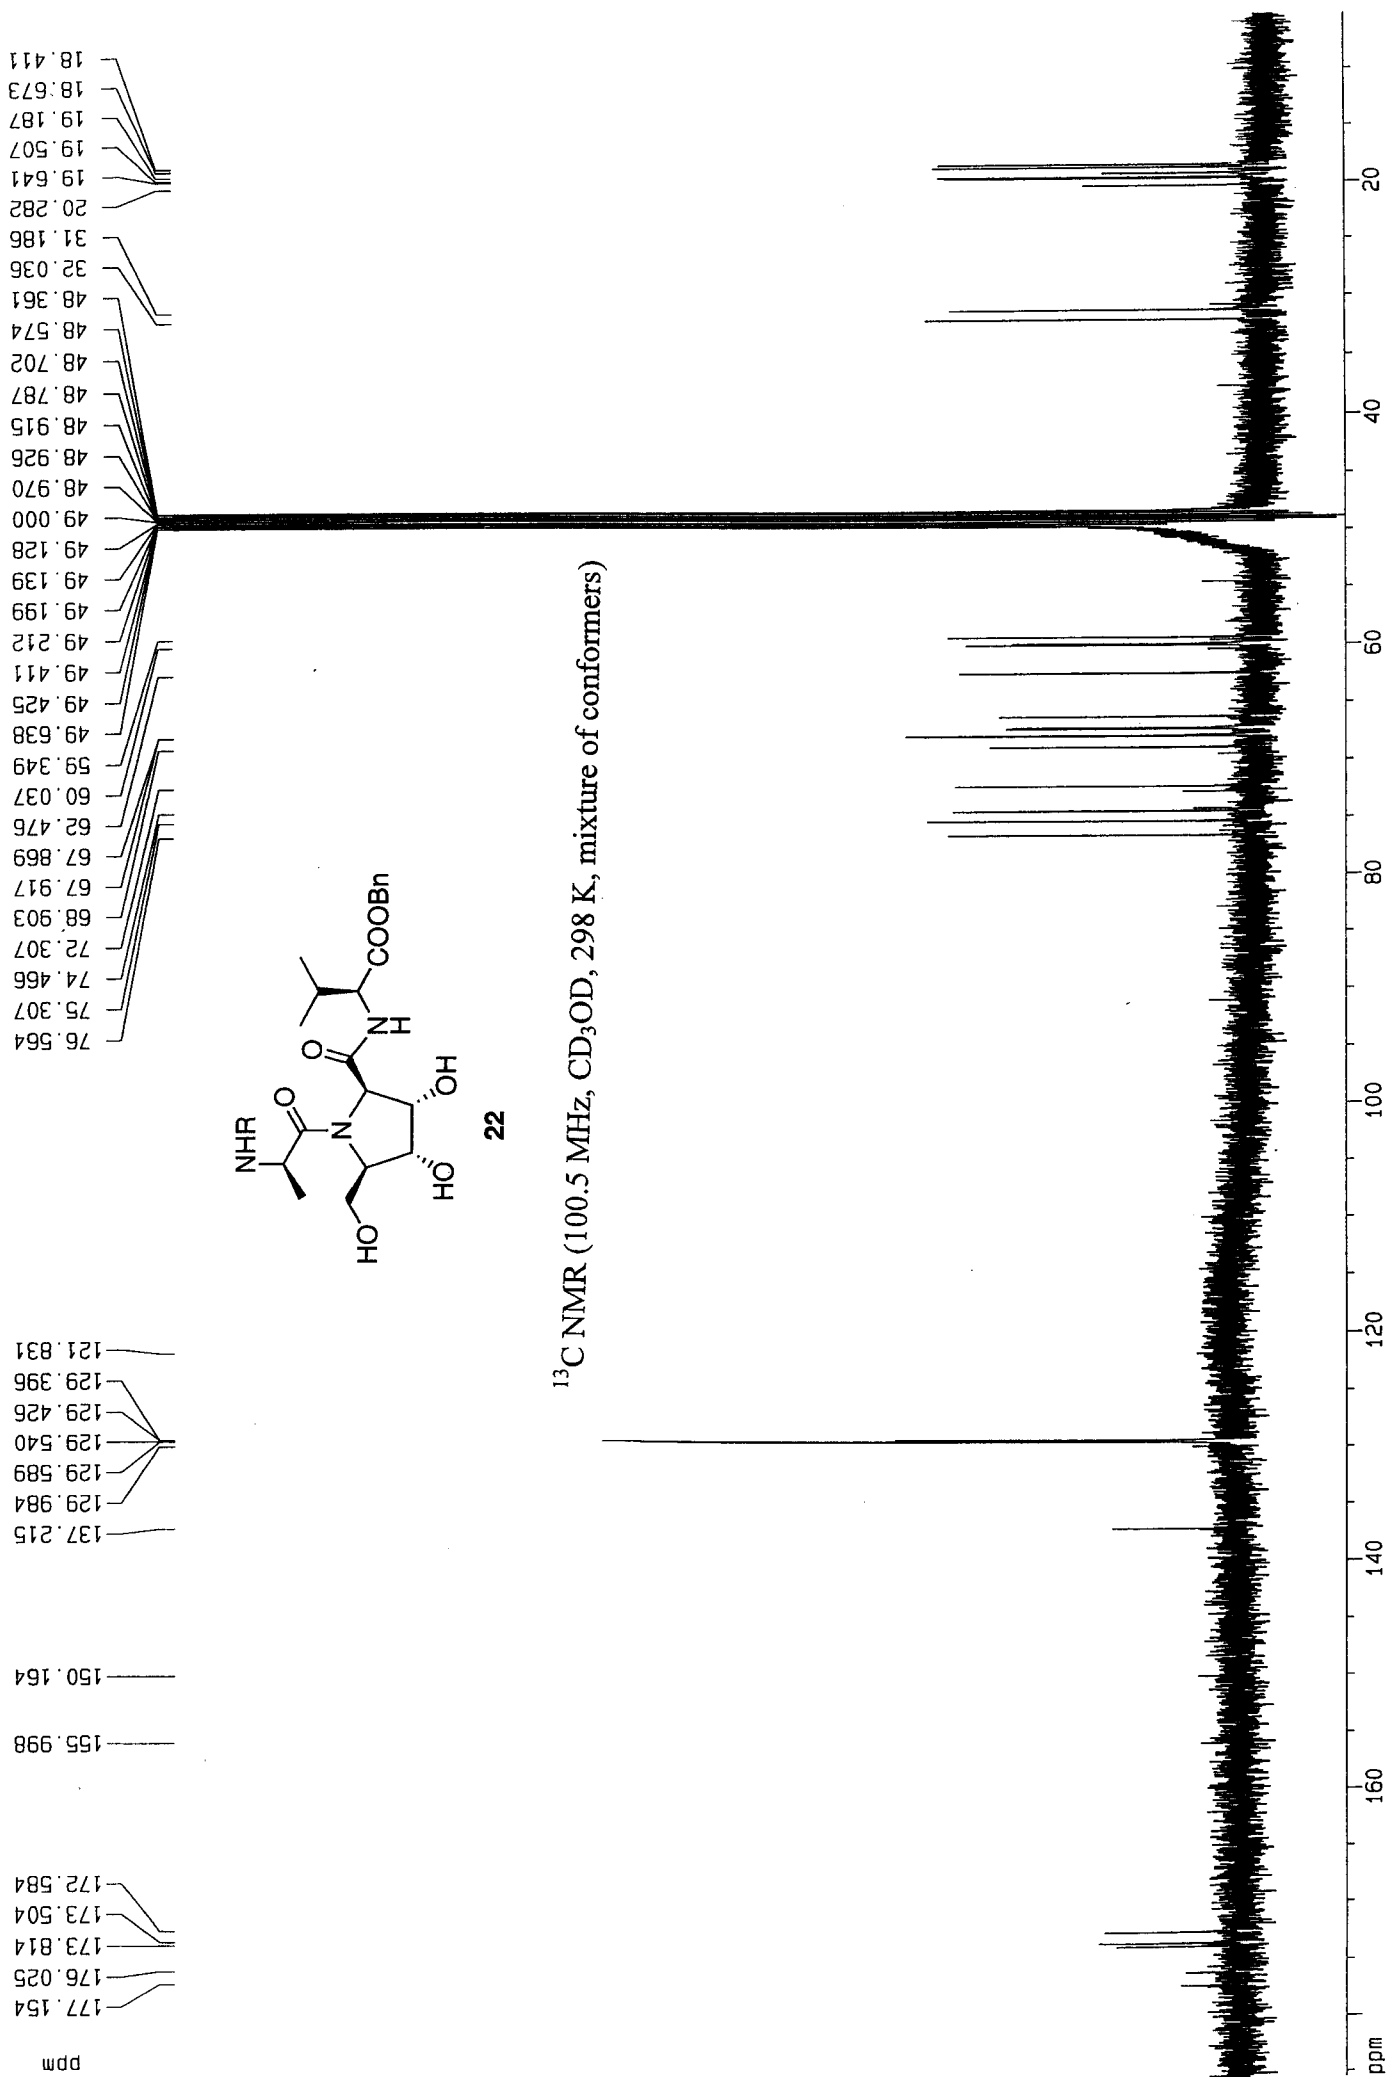

Supplement: Supplementary file 1 [file 5173648]
